# Supplementary material for: Analysis of mainstream emissions, secondhand emissions and the environmental impact of IQOS waste: a systematic review on IQOS that accounts for data source
Source: HighWire-hosted journal article supplement (doi:10.1136/tobaccocontrol-2021-056986), 2022-05-13
Supplement: tobaccocontrol-2021-056986supp001_data_supplement.pdf [file tobaccocontrol-2021-056986supp001_data_supplement.pdf]

## Supporting Information

# A Systematic Review on IQOS: Highlights on Literature Features and Chemical Analysis

*Malak El-Kaassamani, BS,<sup>†</sup> Miaoshan Yen, MS,<sup>£,§</sup> Soha Talih, PhD,<sup>‡,§</sup> and Ahmad El-Hellani, PhD<sup>†,§,\*</sup>*

<sup>†</sup> Department of Chemistry, Faculty of Arts and Sciences, American University of Beirut, Beirut, Lebanon

<sup>‡</sup> Department of Mechanical Engineering, Maroun Semaan Faculty of Engineering and Architecture, American University of Beirut, Beirut, Lebanon

<sup>£</sup> Department of Biostatistics, School of Medicine, Virginia Commonwealth University, Richmond, Virginia, USA

<sup>§</sup> Center for the Study of Tobacco Products, Virginia Commonwealth University, Richmond, Virginia, USA

\* Corresponding author: Ahmad El-Hellani, American University of Beirut, PO Box 11-0235 Riad El Solh, Beirut 1107 2020, Lebanon. Tel: +961 1 350000/4089. E-mail:

[ae74@aub.edu.lb](mailto:ae74@aub.edu.lb)

**Table S1.** Search strategies and outcomes for all databases (**first search on Nov 1<sup>st</sup>, 2020, updated search on Nov 8th, 2021**).

| Database       | Search Strategy                                                                                                                                                                                                                                                                                                                                                                                                                                                                                                                                        | Outcome                                                            |
|----------------|--------------------------------------------------------------------------------------------------------------------------------------------------------------------------------------------------------------------------------------------------------------------------------------------------------------------------------------------------------------------------------------------------------------------------------------------------------------------------------------------------------------------------------------------------------|--------------------------------------------------------------------|
| Scopus         | (ALL (“iqos”) OR ALL (“Heat-not-burn AND tobacco”) OR ALL (“tobacco” AND “heating” AND “system”) OR ALL (“heated” AND “tobacco” AND “product”)) AND NOT INDEX (medline) AND (LIMIT - TO (PUBYEAR, 2020) OR LIMIT- TO (PUBYEAR, 2019) OR LIMIT - TO (PUBYEAR, 2018) OR LIMIT - TO (PUBYEAR, 2017) OR LIMIT- TO (PUBYEAR, 2016) OR LIMIT - TO (PUBYEAR, 2015) OR LIMIT - TO (PUBYEAR, 2014) OR LIMIT- TO (PUBYEAR, 2013) OR LIMIT - TO (PUBYEAR, 2012) OR LIMIT - TO (PUBYEAR, 2011) OR LIMIT- TO (PUBYEAR, 2010)) AND (LIMIT- TO (LANGUAGE, “English”)) | <b>2534 references exported</b><br><i>1156 references exported</i> |
| PubMed         | ((((IQOS) OR (Heat-not-burn tobacco)) OR (Tobacco Heating System )) OR (Heated tobacco product)<br>Limit: 2010-2020.<br>Language filter: English.                                                                                                                                                                                                                                                                                                                                                                                                      | <b>505 references exported</b><br><i>216 references exported</i>   |
| Web of Science | ((ALL = (“IQOS” OR “Heat-not-Burn tobacco” OR “Tobacco Heating System” OR “Heated tobacco product”)) AND Language: (“English”) Period: 2010-2020.                                                                                                                                                                                                                                                                                                                                                                                                      | <b>847 references exported</b><br><i>222 references exported</i>   |

**Table S2.** Categorization of the collected literature according to study funding or author affiliation, the main topic covered, type of publication, and year of publication. The order was sorted according to funding/affiliation. The inserted table summarizes the codes we used for the different categories.

|                      | <b>Variables</b>                                                                                                                                                  | <b>Codes</b>                                      |
|----------------------|-------------------------------------------------------------------------------------------------------------------------------------------------------------------|---------------------------------------------------|
| <b>F/A</b>           | Other manufacturers of HTP (BAT, JTI)<br>Philip Morris International<br>Independent research                                                                      | Other<br>PMI<br>Ind                               |
| <b>Topic</b>         | Chemical analysis<br>Toxicity assessment<br>Human health (Clinical/case report)<br>Perceptions & Awareness & Use & Prevalence<br>Marketing<br>Policy & regulation | Chem<br>Tox<br>Health<br>PAUP<br>Market<br>Policy |
| <b>Type of paper</b> | Original Research article<br>Brief report/Research letter/case report<br>Review<br>Letter/Commentary/protocols/opinion/Industry watch                             | Original<br>Brief<br>Rev<br>LCPOI                 |

  

| <b>Title</b>                                                                                                                                       | <b>DOI/PMID/URL</b>             | <b>Funding/Affiliation</b> | <b>Topic</b> | <b>Type</b> | <b>Year</b> |
|----------------------------------------------------------------------------------------------------------------------------------------------------|---------------------------------|----------------------------|--------------|-------------|-------------|
| A comparative study on changes in the use of heat-not-burn tobacco products based on whether apartment buildings have designated non-smoking areas | 10.18332/TPC/136028             | Ind                        | PAUP         | Original    | 2021        |
| Heat-Not-Burn Tobacco Cigarettes: Smoke by Any Other Name                                                                                          | 10.1001/jamainternmed.2017.1419 | Ind                        | Chem         | LCPOI       | 2017        |

|                                                                                                                                                                                                                                                                              |                                    |     |        |          |      |
|------------------------------------------------------------------------------------------------------------------------------------------------------------------------------------------------------------------------------------------------------------------------------|------------------------------------|-----|--------|----------|------|
| A Newly Developed Aerosol Exposure Apparatus for Heated Tobacco Products for In Vivo Experiments Can Deliver Both Particles and Gas Phase With High Recovery and Depicts the Time-Dependent Variation in Nicotine Metabolites in Mouse Urine                                 | 10.1093/ntr/ntab123                | Ind | Tox    | Original | 2021 |
| Heat-not-burn tobacco products are about to reach their boiling point                                                                                                                                                                                                        | 10.1136/tobaccocontrol-2016-053264 | Ind | PAUP   | LCPOI    | 2017 |
| A sensitive method for the determination of tobacco-specific nitrosamines in mainstream and sidestream smokes of combustion cigarettes and heated tobacco products by online in-tube solid-phase microextraction coupled with liquid chromatography-tandem mass spectrometry | 10.1016/j.aca.2019.04.073          | Ind | Chem   | Original | 2019 |
| A Simple Method to Simultaneously Determine the Level of Nicotine, Glycerol, Propylene Glycol, and Triacetin in Heated Tobacco Products by Gas Chromatography Flame Ionization Detection                                                                                     | 10.1093/jaoacint/qsab140           | Ind | Chem   | Original | 2021 |
| A survey of users of the IQOS tobacco vaporizer: perceived dependence and perceived effects on cigarette withdrawal symptoms                                                                                                                                                 | 10.1080/10550887.2020.1847994      | Ind | PAUP   | Original | 2020 |
| Acute effect of heat-not-burn versus standard cigarette smoking on arterial stiffness and wave reflections in young smokers                                                                                                                                                  | 10.1177/2047487320918365           | Ind | Health | Original | 2021 |
| Acute Effects of a Heat-Not-Burn Tobacco Product on Pulmonary Function                                                                                                                                                                                                       | 10.3390/medicina56060292           | Ind | Health | Original | 2020 |

|                                                                                                                                                                                                                               |                                       |     |        |          |      |
|-------------------------------------------------------------------------------------------------------------------------------------------------------------------------------------------------------------------------------|---------------------------------------|-----|--------|----------|------|
| Acute effects of a heat-not-burn tobacco product on pulmonary function of healthy non smokers                                                                                                                                 | 10.1183/13993003.congress-2019.OA3311 | Ind | Health | Original | 2019 |
| Acute Effects of Heated Tobacco Product (IQOS) Aerosol Inhalation on Lung Tissue Damage and Inflammatory Changes in the Lungs                                                                                                 | 10.1093/ntr/ntaa267                   | Ind | Tox    | Original | 2021 |
| Acute Effects of Heat-Not-Burn, Electronic Vaping, and Traditional Tobacco Combustion Cigarettes: The Sapienza University of Rome-Vascular Assessment of Proatherosclerotic Effects of Smoking (SUR-VAPES) 2 Randomized Trial | 10.1161/jaha.118.010455               | Ind | Health | Original | 2019 |
| Acute effects of JUUL and IQOS in cigarette smokers                                                                                                                                                                           | 10.1136/tobaccocontrol-2019-055475    | Ind | Health | Brief    | 2020 |
| Acute eosinophilic pneumonia following heat-not-burn cigarette smoking                                                                                                                                                        | 10.1002/rcr2.190                      | Ind | Health | Brief    | 2016 |
| Adolescent Use of and Susceptibility to Heated Tobacco Products                                                                                                                                                               | 10.1542/peds.2020-049597              | Ind | PAUP   | Original | 2021 |
| Adult Smokers' Awareness and Interest in Trying Heated Tobacco Products: Perspectives from Mexico, where HTPs and E-Cigarettes are Banned                                                                                     | 10.3390/ijerph17072173                | Ind | PAUP   | Original | 2020 |
| Age restriction and warnings for minor viewing and health risk in heated tobacco product videos on YouTube                                                                                                                    | 10.1080/14659891.2020.1779832         | Ind | Market | Original | 2021 |
| New Zealand's legal action against IQOS postponed, consultation with Big Tobacco follows                                                                                                                                      | 29121631                              | Ind | Policy | LCPOI    | 2017 |

|                                                                                                                                      |                                                                                                                                                                                                                                                                   |     |        |          |      |
|--------------------------------------------------------------------------------------------------------------------------------------|-------------------------------------------------------------------------------------------------------------------------------------------------------------------------------------------------------------------------------------------------------------------|-----|--------|----------|------|
| An overview of IQOS® as a new heat-not-burn tobacco product and its potential effects on human health and the environment            | 10.4274/tjps.galenos.2018.79095                                                                                                                                                                                                                                   | Ind | Health | Rev      | 2019 |
| Analysis of FDA's IQOS marketing authorisation and its policy impacts                                                                | 10.1136/tobaccocontrol-2019-055585                                                                                                                                                                                                                                | Ind | Policy | Original | 2020 |
| Analysis of furans and pyridines from new generation heated tobacco product in Japan                                                 | 10.1186/s12199-021-01008-1                                                                                                                                                                                                                                        | Ind | Chem   | Original | 2021 |
| Analysis of presumed iqos influencer marketing on instagram in the Czech republic in 2018–2019                                       | <a href="https://www.scopus.com/inward/record.uri?eid=2-s2.0-85073752127&amp;partnerID=40&amp;md5=114d21719b9f07133df47e928c43229b">https://www.scopus.com/inward/record.uri?eid=2-s2.0-85073752127&amp;partnerID=40&amp;md5=114d21719b9f07133df47e928c43229b</a> | Ind | Market | Original | 2019 |
| Are Heated Tobacco Product Users Less Likely to Quit than Cigarette Smokers? Findings from THINK (Tobacco and Health IN Korea) Study | 10.3390/ijerph17228622                                                                                                                                                                                                                                            | Ind | PAUP   | Original | 2020 |
| Assessment of industry data on pulmonary and immunosuppressive effects of IQOS                                                       | 10.1136/tobaccocontrol-2018-054296                                                                                                                                                                                                                                | Ind | Health | Original | 2018 |

|                                                                                                                                                                    |                                    |     |        |          |      |
|--------------------------------------------------------------------------------------------------------------------------------------------------------------------|------------------------------------|-----|--------|----------|------|
| Assessment of IQOS Marketing Strategies at Points-of-Sale in Israel at a Time of Regulatory Transition                                                             | 10.1093/ntr/ntab142                | Ind | Market | Original | 2021 |
| Assessment of tobacco heating system 2.4 on osteogenic differentiation of mesenchymal stem cells and primary human osteoblasts compared to conventional cigarettes | 10.4252/WJSC.V12.I8.841            | Ind | Tox    | Original | 2020 |
| Association of alcohol and drug use with use of electronic cigarettes and heat-not-burn tobacco products among Korean adolescents                                  | 10.1371/journal.pone.0220241       | Ind | PAUP   | Original | 2019 |
| Association of heated tobacco product use with smoking cessation in Chinese cigarette smokers in Hong Kong: a prospective study                                    | 10.1136/tobaccocontrol-2020-055857 | Ind | PAUP   | Original | 2020 |
| Awareness and Ever Use of "Heat-Not-Burn" Tobacco Products Among US Adults, 2017                                                                                   | 10.1016/j.amepre.2018.04.031       | Ind | PAUP   | Brief    | 2018 |
| Awareness and interest in IQOS heated tobacco products among youth in Canada, England and the USA                                                                  | 10.1136/tobaccocontrol-2018-054654 | Ind | PAUP   | Original | 2020 |
| Awareness and perceived risk of heated tobacco products                                                                                                            | 10.18001/trs.6.1.2                 | Ind | PAUP   | Original | 2020 |
| Awareness and use of electronic cigarettes and heat-not-burn tobacco products in Japan                                                                             | 10.1111/add.13231                  | Ind | PAUP   | Original | 2016 |
| Awareness and use of heated tobacco products among US adults, 2016-2017                                                                                            | 10.1136/tobaccocontrol-2018-054323 | Ind | PAUP   | Original | 2018 |

|                                                                                                                                                                                                   |                                    |     |        |          |      |
|---------------------------------------------------------------------------------------------------------------------------------------------------------------------------------------------------|------------------------------------|-----|--------|----------|------|
| Awareness and Use of Heated Tobacco Products among Youth Smokers in Hong Kong: A Cross-Sectional Study                                                                                            | 10.3390/ijerph17228575             | Ind | PAUP   | Original | 2020 |
| Awareness and Use of 'Heat-not-burn' Tobacco Products in Great Britain                                                                                                                            | 10.18001/trs.4.2.4                 | Ind | PAUP   | Original | 2018 |
| Awareness of Marketing of Heated Tobacco Products and Cigarettes and Support for Tobacco Marketing Restrictions in Japan: Findings from the 2018 International Tobacco Control (ITC) Japan Survey | 10.3390/ijerph17228418             | Ind | Market | Original | 2020 |
| Awareness, experience and prevalence of heated tobacco product, IQOS, among young Korean adults                                                                                                   | 10.1136/tobaccocontrol-2018-054390 | Ind | PAUP   | Brief    | 2018 |
| Awareness, trial and use of heated tobacco products among adult cigarette smokers and e-cigarette users: findings from the 2018 ITC Four Country Smoking and Vaping Survey                        | 10.1136/tobaccocontrol-2020-055985 | Ind | PAUP   | Original | 2020 |
| Beliefs about the Harmfulness of Heated Tobacco Products Compared with Combustible Cigarettes and Their Effectiveness for Smoking Cessation among Korean Adults                                   | 10.3390/ijerph17155591             | Ind | PAUP   | Original | 2020 |
| New Zealand's legal action against IQOS postponed, consultation with Big Tobacco follows: a response from the Ministry of Health                                                                  | 29240751                           | Ind | Policy | LCPOI    | 2017 |
| Carbonyl emissions from a novel heated tobacco product (IQOS): comparison with an e-cigarette and a tobacco cigarette                                                                             | 10.1111/add.14365                  | Ind | Chem   | Original | 2018 |
| Categorizing IQOS-Related Twitter Discussions                                                                                                                                                     | 10.3390/ijerph18094836             | Ind | Market | Original | 2021 |



|                                                                                                                                                                                 |                                     |     |      |          |      |
|---------------------------------------------------------------------------------------------------------------------------------------------------------------------------------|-------------------------------------|-----|------|----------|------|
| Changes in smoking habits and behaviors following the introduction and spread of heated tobacco products in Japan and its effect on FEV(1) decline: a longitudinal cohort study | 10.2188/jea.JE2021007<br>5          | Ind | PAUP | Original | 2021 |
| Characterization of airborne particles emitted by an electrically heated tobacco smoking system                                                                                 | 10.1016/j.envpol.2018.<br>04.137    | Ind | Chem | Original | 2018 |
| Chemical Analysis and Simulated Pyrolysis of Tobacco Heating System 2.2 Compared to Conventional Cigarettes                                                                     | 10.1093/ntr/nty005                  | Ind | Chem | Original | 2019 |
| Cigarette smoke extract and heated tobacco products promote ferritin cleavage and iron accumulation in human corneal epithelial cells                                           | 10.1038/s41598-021-<br>97956-3      | Ind | Tox  | Original | 2021 |
| Combustible cigarettes, heated tobacco products, combined product use, and periodontal disease: A cross-sectional JASTIS study                                                  | 10.1371/journal.pone.0<br>248989    | Ind | PAUP | Original | 2021 |
| No Smoke-Just Cancer-Causing Chemicals                                                                                                                                          | 10.1001/jamainternme<br>d.2017.1425 | Ind | Chem | LCPOI    | 2017 |
| Perplexing Conclusions Concerning Heat-Not-Burn Tobacco Cigarettes                                                                                                              | 10.1001/jamainternme<br>d.2017.5843 | Ind | Chem | LCPOI    | 2017 |
| Comparative Indoor Pollution from Glo, Iqos, and Juul, Using Traditional Combustion Cigarettes as Benchmark: Evidence from the Randomized SUR-VAPES AIR Trial                   | 10.3390/ijerph1717602<br>9          | Ind | Chem | Original | 2020 |

|                                                                                                                                                                   |                                |     |        |          |      |
|-------------------------------------------------------------------------------------------------------------------------------------------------------------------|--------------------------------|-----|--------|----------|------|
| Comparing Factors Related to Any Conventional Cigarette Smokers, Exclusive New Alternative Product Users, and Non-Users among Japanese Youth: A Nationwide Survey | 10.3390/ijerph17093128         | Ind | PAUP   | Original | 2020 |
| Comparing the Characteristics of Cigarette Smoking and e-Cigarette and IQOS Use among Adolescents in Taiwan                                                       | 10.1155/2020/7391587           | Ind | PAUP   | Original | 2020 |
| Comparison of Chemicals in Mainstream Smoke in Heat-not-burn Tobacco and Combustion Cigarettes                                                                    | 10.7888/juoeh.39.201           | Ind | Chem   | Original | 2017 |
| Comparison of cytotoxicity of cigarette smoke extract derived from heat-not-burn and combustion cigarettes in human vascular endothelial cells                    | 10.1016/j.jphs.2021.07.005     | Ind | Tox    | Original | 2021 |
| Comparison of cytotoxicity of IQOS aerosols to smoke from Marlboro Red and 3R4F reference cigarettes                                                              | 10.1016/j.tiv.2019.104652      | Ind | Tox    | Original | 2019 |
| Comparison of End Tidal Carbon Monoxide Levels between Conventional Cigarette, Electronic Cigarette and Heated Tobacco Product among Asiatic Smokers              | 10.1080/10826084.2020.1781180  | Ind | Health | Original | 2020 |
| Comparison of Free Radical Levels in the Aerosol from Conventional Cigarettes, Electronic Cigarettes, and Heat-Not-Burn Tobacco Products                          | 10.1021/acs.chemrestox.9b00085 | Ind | Chem   | Original | 2019 |
| Comparison of IQOS (heated tobacco) and cigarette smoking on cardiac functions by two-dimensional speckle tracking echocardiography                               | 10.1016/j.taap.2021.115575     | Ind | Health | Original | 2021 |

|                                                                                                                                                                                                                  |                                    |     |        |          |      |
|------------------------------------------------------------------------------------------------------------------------------------------------------------------------------------------------------------------|------------------------------------|-----|--------|----------|------|
| Comparison of the chemical composition of aerosols from heated tobacco products, electronic cigarettes and tobacco cigarettes and their toxic impacts on the human bronchial epithelial BEAS-2B cells            | 10.1016/j.jhazmat.2020.123417      | Ind | Chem   | Original | 2021 |
| Concurrent Daily and Non-Daily Use of Heated Tobacco Products with Combustible Cigarettes: Findings from the 2018 ITC Japan Survey                                                                               | 10.3390/ijerph17062098             | Ind | PAUP   | Original | 2020 |
| Correlates of Awareness and Use of Heated Tobacco Products in a Sample of US Young Adults in 2018-2019                                                                                                           | 10.1093/ntr/ntaa007                | Ind | PAUP   | Original | 2020 |
| Creating a market for IQOS: analysis of Philip Morris' strategy to introduce heated tobacco products to the Australian consumer market                                                                           | 10.1136/tobaccocontrol-2020-056057 | Ind | Market | Original | 2020 |
| Criminal mercury vapor poisoning using heated tobacco product                                                                                                                                                    | 10.1007/s00414-018-1923-4          | Ind | Health | Brief    | 2019 |
| Cross-sectional study on the awareness, susceptibility and use of heated tobacco products among adolescents in Guatemala City, Guatemala                                                                         | 10.1136/bmjopen-2020-039792        | Ind | PAUP   | Original | 2020 |
| Cytotoxic effects of heated tobacco products (HTP) on human bronchial epithelial cells                                                                                                                           | 10.1136/tobaccocontrol-2018-054317 | Ind | Tox    | Brief    | 2018 |
| Development of a standardized new cigarette smoke generating (SNCSG) system for the assessment of chemicals in the smoke of new cigarette types (heat-not-burn (HNB) tobacco and electronic cigarettes (E-Cigs)) | 10.1016/j.envres.2020.109413       | Ind | Chem   | Original | 2020 |

|                                                                                                                                                    |                                    |     |        |          |      |
|----------------------------------------------------------------------------------------------------------------------------------------------------|------------------------------------|-----|--------|----------|------|
| Differential effects of heat-not-burn and conventional cigarettes on coronary flow, myocardial and vascular function                               | 10.1038/s41598-021-91245-9         | Ind | Health | Original | 2021 |
| DNA methylation abnormalities and altered whole transcriptome profiles after switching from combustible tobacco smoking to heated tobacco products | 10.1158/1055-9965.Epi-21-0444      | Ind | Health | Original | 2021 |
| Do Young Adults Attend to Health Warnings in the First IQOS Advertisement in the US? An Eye-Tracking Approach                                      | 10.1093/ntr/ntaa243                | Ind | Market | Original | 2021 |
| Early adoption of heated tobacco products resembles that of e-cigarettes                                                                           | 10.1136/tobaccocontrol-2020-056089 | Ind | PAUP   | Original | 2021 |
| E-cigarettes or heat-not-burn tobacco products - advantages or disadvantages for the lungs of smokers                                              | 10.5603/arm.2019.0020              | Ind | Health | Rev      | 2019 |
| Educational gradients in the use of electronic cigarettes and heat-not-burn tobacco products in Japan                                              | 10.1371/journal.pone.0191008       | Ind | PAUP   | Original | 2018 |
| Effect of a hypothetical modified risk tobacco product claim on heated tobacco product use intention and perceptions in young adults               | 10.1136/tobaccocontrol-2021-056479 | Ind | PAUP   | Original | 2021 |
| Effect of IQOS introduction on cigarette sales: evidence of decline and replacement                                                                | 10.1136/tobaccocontrol-2019-054998 | Ind | Market | Original | 2020 |

|                                                                                                                                                          |                                    |     |      |          |      |
|----------------------------------------------------------------------------------------------------------------------------------------------------------|------------------------------------|-----|------|----------|------|
| Perplexing Conclusions Concerning Heat-Not-Burn Tobacco Cigarettes-Reply                                                                                 | 10.1001/jamainternmed.2017.5861    | Ind | Chem | LCPOI    | 2017 |
| Effects of conventional and heated tobacco product smoking on discoloration of artificial denture teeth                                                  | 10.1016/j.prosdent.2020.05.031     | Ind | Tox  | Original | 2021 |
| Effects of Exposure to Tobacco Cigarette, Electronic Cigarette and Heated Tobacco Product on Adipocyte Survival and Differentiation In Vitro             | 10.3390/toxics8010009              | Ind | Tox  | Original | 2020 |
| Effects of Fetal Exposure to Heat-Not-Burn Tobacco on Testicular Function in Male Offspring                                                              | 10.1248/bpb.b20-00390              | Ind | Tox  | Original | 2020 |
| Effects of IQOS health warnings and modified risk claims among young adult cigarette smokers and non-smokers                                             | 10.1136/tobaccocontrol-2021-056810 | Ind | PAUP | Brief    | 2021 |
| Effects of modified risk tobacco product claims on consumer comprehension and risk perceptions of IQOS                                                   | 10.1136/tobaccocontrol-2020-056191 | Ind | PAUP | Original | 2021 |
| Effects of tobacco product type and characteristics on appeal and perceived harm: Results from a discrete choice experiment among Guatemalan adolescents | 10.1016/j.yjmed.2021.106590        | Ind | PAUP | Original | 2021 |
| Effects of visual exposure to iqos use on smoking urge and behavior                                                                                      | 10.18001/TRS.7.1.3                 | Ind | PAUP | Original | 2021 |
| E-learning course improves knowledge in tobacco dependence, electronic nicotine delivery systems and heat-not-burn products in Medical School students   | 10.7417/ct.2021.2353               | Ind | PAUP | Original | 2021 |

|                                                                                                                                                                                     |                                    |     |        |          |      |
|-------------------------------------------------------------------------------------------------------------------------------------------------------------------------------------|------------------------------------|-----|--------|----------|------|
| Electronic, heat-not-burn, and combustible cigarette use among chronic disease patients in Japan: A cross-sectional study                                                           | 10.18332/tid/94455                 | Ind | PAUP   | Original | 2018 |
| Environmental pollution and emission factors of electronic cigarettes, heat-not-burn tobacco products, and conventional cigarettes                                                  | 10.1080/02786826.2017.1300231      | Ind | Chem   | Original | 2017 |
| Estimating the Carcinogenic Potency of Second-Hand Smoke and Aerosol from Cigarettes and Heated Tobacco Products                                                                    | 10.3390/ijerph17228319             | Ind | Health | Original | 2020 |
| Evaluation of the Opinions of Family Physicians on Some Tobacco Products                                                                                                            | 10.1007/s10900-020-00872-2         | Ind | PAUP   | Original | 2020 |
| Evaluation of Tobacco Product-Selling Websites Accessed Using Search Engines                                                                                                        | 10.5152/TurkThoracJ.2019.190124    | Ind | Market | Original | 2020 |
| Evolving IQOS packaging designs change perceptions of product appeal, uniqueness, quality and safety: a randomised experiment, 2018, USA                                            | 10.1136/tobaccocontrol-2018-054910 | Ind | PAUP   | Brief    | 2019 |
| Examining perceptions about IQOS heated tobacco product: consumer studies in Japan and Switzerland                                                                                  | 10.1136/tobaccocontrol-2018-054322 | Ind | PAUP   | Original | 2018 |
| Exhaled Carbon Monoxide Levels in Forty Resistant to Cessation Male Smokers after Six Months of Full Switch to Electronic Cigarettes (e-Cigs) or to A Tobacco Heating Systems (THS) | 10.3390/ijerph16203916             | Ind | Health | Original | 2019 |

|                                                                                                                                           |                                    |     |        |          |      |
|-------------------------------------------------------------------------------------------------------------------------------------------|------------------------------------|-----|--------|----------|------|
| Exposure Assessment of Environmental Tobacco Aerosol from Heated Tobacco Products: Nicotine and PM Exposures under Two Limited Conditions | 10.3390/ijerph1722853<br>6         | Ind | Chem   | Original | 2020 |
| Exposure of heat-not-burn tobacco effect on the quality of air and expiratory plume                                                       | 10.1016/j.microc.2021.106733       | Ind | Chem   | Original | 2021 |
| Health consequences of smoking - focusing on alternative smoking methods                                                                  | 10.5114/pja.2019.8829<br>1         | Ind | Health | Rev      | 2019 |
| Factors that influence smokers' and ex-smokers' use of IQOS: a qualitative study of IQOS users and ex-users in the UK                     | 10.1136/tobaccocontrol-2019-055306 | Ind | PAUP   | Original | 2021 |
| FDA's reduced exposure marketing order for IQOS: Why it is not a reliable global model                                                    | 10.1136/tobaccocontrol-2020-056316 | Ind | Policy | Original | 2021 |
| Free Radical Production and Characterization of Heat-Not-Burn Cigarettes in Comparison to Conventional and Electronic Cigarettes          | 10.1021/acs.chemrestox.0c00088     | Ind | Chem   | Original | 2020 |
| Free-Base and Total Nicotine, Reactive Oxygen Species, and Carbonyl Emissions From IQOS, a Heated Tobacco Product                         | 10.1093/ntr/nty235                 | Ind | Chem   | Original | 2019 |
| Free-Base Nicotine Is Nearly Absent in Aerosol from IQOS Heat-Not-Burn Devices, As Determined by H-1 NMR Spectroscopy                     | 10.1021/acs.chemrestox.9b00076     | Ind | Chem   | Original | 2019 |
| Gendered factors for heated tobacco product use: Focus group interviews with Korean adults                                                | 10.18332/TID/120103                | Ind | PAUP   | Original | 2020 |

|                                                                                                                                                           |                                    |     |        |          |      |
|-----------------------------------------------------------------------------------------------------------------------------------------------------------|------------------------------------|-----|--------|----------|------|
| Google shopping queries for vaping products, JUUL and IQOS during the E-cigarette, or Vaping, product use Associated Lung Injury (EVALI) outbreak         | 10.1136/tobaccocontrol-2021-056481 | Ind | PAUP   | Brief    | 2021 |
| Harm Perceptions and Beliefs about Potential Modified Risk Tobacco Products                                                                               | 10.3390/ijerph18020576             | Ind | PAUP   | Original | 2021 |
| Harmful chemicals of heat not burn product and its induced oxidative stress of macrophages at air-liquid interface: Comparison with ultra-light cigarette | 10.1016/j.toxlet.2020.06.017       | Ind | Chem   | Original | 2020 |
| Heated Tobacco Products: A Review of Current Knowledge and Initial Assessments                                                                            | 10.3389/fpubh.2019.00287           | Ind | Health | Rev      | 2019 |
| Health outcomes in COPD smokers using heated tobacco products: a 3-year follow-up                                                                         | 10.1007/s11739-021-02674-3         | Ind | Health | Original | 2021 |
| Heat-not-burn tobacco products: a systematic literature review                                                                                            | 10.1136/tobaccocontrol-2018-054419 | Ind | Chem   | Rev      | 2019 |
| Heat not burn tobacco promotion on instagram                                                                                                              | 10.1016/j.addbeh.2018.09.003       | Ind | Market | Original | 2019 |
| Heated debates on regulations of heated tobacco products in South Korea: the news valence, source and framing of relative risk/benefit                    | 10.1136/tobaccocontrol-2020-056131 | Ind | Policy | Original | 2021 |



|                                                                                                         |                                       |     |        |          |      |
|---------------------------------------------------------------------------------------------------------|---------------------------------------|-----|--------|----------|------|
| Heated Tobacco Product Awareness, Use, and Perceptions in a Sample of Young Adults in the United States | 10.1093/ntr/ntab058                   | Ind | PAUP   | Brief    | 2021 |
| Heated tobacco product marketing: internet platforms undermine regulations                              | 10.1183/13993003.congress-2019.PA1693 | Ind | Market | Original | 2019 |
| Heated tobacco product regulation under US law and the FCTC                                             | 10.1136/tobaccocontrol-2018-054560    | Ind | Policy | Original | 2018 |
| Heated tobacco product smokers in Japan identified by a population-based survey                         | 10.2188/jea.JE20190199                | Ind | PAUP   | Original | 2019 |
| Heated tobacco product use among Korean adolescents                                                     | 10.1136/tobaccocontrol-2019-054949    | Ind | PAUP   | Brief    | 2020 |
| Heated tobacco product use among US adolescents in 2019: The new tobacco risk                           | 10.18332/tpc/130502                   | Ind | PAUP   | Original | 2021 |
| Heated tobacco product use and associated factors among U.S. youth, 2019                                | 10.1016/j.drugalcdep.2020.108150      | Ind | PAUP   | Original | 2020 |
| Heated tobacco product use and its relationship to quitting combustible cigarettes in Korean adults     | 10.1371/journal.pone.0251243          | Ind | PAUP   | Original | 2021 |
| Heated tobacco products and combusted cigarettes: comparing global prices and taxes                     | 10.1136/tobaccocontrol-2018-054602    | Ind | Policy | Brief    | 2019 |

|                                                                                                                     |                                        |     |        |          |      |
|---------------------------------------------------------------------------------------------------------------------|----------------------------------------|-----|--------|----------|------|
| Heated Tobacco Products and Nicotine Pouches: A Survey of People with Experience of Smoking and/or Vaping in the UK | 10.3390/ijerph1816885<br>2             | Ind | Health | Original | 2021 |
| A critical appraisal of the harm reduction argument for heat-not-burn tobacco products                              | 10.26633/rpsp.2018.16<br>1             | Ind | Policy | LCPOI    | 2018 |
| Heated Tobacco Products Have Reached Younger or More Affluent People in Japan                                       | 10.2188/jea.JE2019026<br>0             | Ind | PAUP   | Original | 2021 |
| Heated tobacco products likely appeal to adolescents and young adults                                               | 10.1136/tobaccocontro<br>l-2018-054596 | Ind | PAUP   | Original | 2018 |
| Heated tobacco products use in Chinese adults in Hong Kong: a population-based cross-sectional study                | 10.1136/tobaccocontro<br>l-2018-054719 | Ind | PAUP   | Original | 2020 |
| Human Biomarker Exposure From Cigarettes Versus Novel Heat-Not-Burn Devices: A Systematic Review and Meta-Analysis  | 10.1093/ntr/ntz200                     | Ind | Health | Rev      | 2019 |
| Carbon monoxide levels after inhalation from new generation heated tobacco products                                 | 10.1186/s12931-018-<br>0867-z          | Ind | Health | LCPOI    | 2018 |
| Heated Tobacco Products: Awareness and Ever Use Among U.S. Adults                                                   | 10.1016/j.amepre.2020<br>.11.011       | Ind | PAUP   | Original | 2021 |

|                                                                                                                                                         |                                    |     |        |          |      |
|---------------------------------------------------------------------------------------------------------------------------------------------------------|------------------------------------|-----|--------|----------|------|
| Heated tobacco products: Cigarette complements, not substitutes                                                                                         | 10.1016/j.drugalcdep.2019.107576   | Ind | PAUP   | Original | 2019 |
| Commentary on 'This could change everything'                                                                                                            | 10.1136/tobaccocontrol-2018-054451 | Ind | Policy | LCPOI    | 2018 |
| Heated tobacco products: another tobacco industry global strategy to slow progress in tobacco control                                                   | 10.1136/tobaccocontrol-2018-054340 | Ind | Policy | LCPOI    | 2018 |
| Heated Tobacco Products: Volatile Emissions and Their Predicted Impact on Indoor Air Quality                                                            | 10.1021/acs.est.9b02544            | Ind | Chem   | Original | 2019 |
| Heat-Not-Burn cigarette induces oxidative stress response in primary rat alveolar epithelial cells                                                      | 10.1371/journal.pone.0242789       | Ind | Tox    | Original | 2020 |
| Heat-not-burn cigarettes induce fulminant acute eosinophilic pneumonia requiring extracorporeal membrane oxygenation                                    | 10.1016/j.rmcr.2018.12.002         | Ind | Health | Brief    | 2019 |
| Heat-not-burn tobacco (IQOS), oral fibroblasts and keratinocytes: cytotoxicity, morphological analysis, apoptosis and cellular cycle. An in vitro study | 10.1111/jre.12888                  | Ind | Tox    | Original | 2021 |
| Heated tobacco products: the example of IQOS                                                                                                            | 10.1136/tobaccocontrol-2018-054601 | Ind | Health | LCPOI    | 2018 |

|                                                                                                                                                         |                                        |     |        |          |      |
|---------------------------------------------------------------------------------------------------------------------------------------------------------|----------------------------------------|-----|--------|----------|------|
| Heat-not-burn tobacco product use in Japan: its prevalence, predictors and perceived symptoms from exposure to secondhand heat-not-burn tobacco aerosol | 10.1136/tobaccocontro<br>l-2017-053947 | Ind | PAUP   | Original | 2018 |
| Heat-not-burn Tobacco Products and the Increased Risk for Poly-tobacco Use                                                                              | 10.5993/ajhb.45.1.16                   | Ind | PAUP   | Original | 2021 |
| Heated tobacco products: things we do and do not know                                                                                                   | 10.1136/tobaccocontro<br>l-2018-054774 | Ind | Health | LCPOI    | 2018 |
| Heat-Not-Burn Tobacco Products Are Getting Hot in Italy                                                                                                 | 10.2188/jea.JE2018004<br>0             | Ind | PAUP   | LCPOI    | 2018 |
| New ideas, old problems? Heated tobacco products - a systematic review                                                                                  | 10.13075/ijomeh.1896.<br>01433         | Ind | Health | Rev      | 2019 |
| Heat Not Burn Tobacco Product-A New Global Trend: Impact of Heat-Not-Burn Tobacco Products on Public Health, a Systematic Review                        | 10.3390/ijerph1702040<br>9             | Ind | PAUP   | Rev      | 2020 |
| Heat-not-burn tobacco products: concerns from the Italian experience                                                                                    | 10.1136/tobaccocontro<br>l-2017-054054 | Ind | PAUP   | Brief    | 2019 |
| Heat-Not-Burn Tobacco Products: The Devil in Disguise or a Considerable Risk Reduction?                                                                 | 10.7895/ijadr.250                      | Ind | Tox    | Original | 2018 |
| Heat-not-Burn Tobacco Products: Tobacco Industry Claims No Substitute for Science                                                                       | 10.1542/peds.2017-<br>2383             | Ind | Policy | LCPOI    | 2018 |

|                                                                                                                                                 |                                    |     |        |          |      |
|-------------------------------------------------------------------------------------------------------------------------------------------------|------------------------------------|-----|--------|----------|------|
| Heat-not-burn tobacco, electronic cigarettes, and combustible cigarette use among Japanese adolescents: a nationwide population survey 2017     | 10.1186/s12889-020-08916-x         | Ind | PAUP   | Original | 2020 |
| Heat-Not-Burn Tobacco Products: An Emerging Threat to Cardiovascular Health                                                                     | 10.1152/ajpheart.00708.2020        | Ind | Health | Rev      | 2020 |
| 'I perceive it to be less harmful, I have no idea if it is or not:' a qualitative exploration of the harm perceptions of IQOS among adult users | 10.1186/s12954-021-00490-8         | Ind | PAUP   | Original | 2021 |
| Immunotoxic mechanisms of cigarette smoke and heat-not-burn tobacco vapor on Jurkat T cell functions                                            | 10.1016/j.envpol.2020.115863       | Ind | Tox    | Original | 2021 |
| Impact of Electronic Alternatives to Tobacco Cigarettes on Indoor Air Particular Matter Levels                                                  | 10.3390/ijerph17082947             | Ind | Chem   | Original | 2020 |
| Impact of exclusive e-cigarettes and heated tobacco products use on muco-ciliary clearance                                                      | 10.1177/20406223211035267          | Ind | Health | Original | 2021 |
| Impact of modified risk tobacco product claims on beliefs of US adults and adolescents                                                          | 10.1136/tobaccocontrol-2018-054315 | Ind | PAUP   | Original | 2018 |
| Inferences beyond a claim: A typology of potential halo effects related to modified risk tobacco product claims                                 | 10.1136/tobaccocontrol-2019-055560 | Ind | Market | Original | 2021 |

|                                                                                                                                                                                                   |                                    |     |        |          |      |
|---------------------------------------------------------------------------------------------------------------------------------------------------------------------------------------------------|------------------------------------|-----|--------|----------|------|
| Informing IQOS Regulations in the United States: A Synthesis of What We Know                                                                                                                      | 10.1177/2158244019898823           | Ind | Policy | Rev      | 2020 |
| Investigation of Volatile Organic Compounds and Benzo a pyrene Contents in the Aerosols of Cigarettes and IQOS Tobacco Heating System Using High-Performance Gas Chromatography/Mass Spectrometry | 10.1007/s12668-021-00898-3         | Ind | Chem   | Original | 2021 |
| IQOS ? a heat-not-burn (HnB) tobacco product ? chemical composition and possible impact on oxidative stress and inflammatory response. A systematic review                                        | 10.1080/15376516.2019.1669245      | Ind | Chem   | Rev      | 2020 |
| IQOS campaign in Israel                                                                                                                                                                           | 10.1136/tobaccocontrol-2018-054619 | Ind | Market | LCPOI    | 2018 |
| Lest We Forget: Harm-Reduction Research is Important and Increasing, but Other Facets of Tobacco Control Research Remain a High Priority                                                          | 10.1093/ntr/ntx260                 | Ind | Policy | LCPOI    | 2018 |
| NEW ZEALAND COURT DISMISSES MINISTRY OF HEALTH CASE AGAINST 'HEAT-NOT-BURN' TOBACCO PRODUCTS, HIGHLIGHTING THE NEED TO FUTURE-PROOF TOBACCO CONTROL LAWS                                          | 10.1111/add.14376                  | Ind | Policy | LCPOI    | 2018 |
| Philip Morris International introduces new heat-not-burn product, IQOS, in South Korea                                                                                                            | 10.1136/tobaccocontrol-2017-053965 | Ind | Market | LCPOI    | 2018 |
| IQOS labelling will mislead consumers                                                                                                                                                             | 10.1136/tobaccocontrol-2018-054333 | Ind | Market | Original | 2018 |

|                                                                                                                                                                 |                                    |     |        |          |      |
|-----------------------------------------------------------------------------------------------------------------------------------------------------------------|------------------------------------|-----|--------|----------|------|
| Possible hepatotoxicity of IQOS                                                                                                                                 | 10.1136/tobaccocontrol-2018-054320 | Ind | Tox    | LCPOI    | 2018 |
| IQOS marketing strategies in the USA before and after US FDA modified risk tobacco product authorisation                                                        | 10.1136/tobaccocontrol-2021-056819 | Ind | Market | Original | 2021 |
| IQOS point-of-sale marketing strategies in Israel: a pilot study                                                                                                | 10.1186/s13584-018-0277-1          | Ind | Market | Brief    | 2019 |
| IQOS(TM) vs. e-Cigarette vs. Tobacco Cigarette: A Direct Comparison of Short-Term Effects after Overnight-Abstinence                                            | 10.3390/ijerph15122902             | Ind | Health | Original | 2018 |
| IQOS: evidence of pyrolysis and release of a toxicant from plastic                                                                                              | 10.1136/tobaccocontrol-2017-054104 | Ind | Chem   | Original | 2019 |
| IQOS: examination of Philip Morris International's claim of reduced exposure                                                                                    | 10.1136/tobaccocontrol-2018-054321 | Ind | Chem   | Original | 2018 |
| Commentary on Gravely et al (2019): Beginning a new era of nicotine products-beyond the four national-level determinants of nicotine vaping products (NVPs) use | 10.1111/add.14611                  | Ind | PAUP   | LCPOI    | 2019 |
| Levels of selected analytes in the emissions of "heat not burn" tobacco products that are relevant to assess human health risks                                 | 10.1007/s00204-018-2215-y          | Ind | Chem   | Original | 2018 |

|                                                                                                                                                                     |                                    |     |        |          |      |
|---------------------------------------------------------------------------------------------------------------------------------------------------------------------|------------------------------------|-----|--------|----------|------|
| Light and mild redux: heated tobacco products' reduced exposure claims are likely to be misunderstood as reduced risk claims                                        | 10.26633/rpsp.2018.161             | Ind | Market | Original | 2018 |
| Marketing IQOS in a dark market                                                                                                                                     | 10.1136/tobaccocontrol-2017-054216 | Ind | Market | Brief    | 2019 |
| Mechanisms of toxicity and biomarkers of flavoring and flavor enhancing chemicals in emerging tobacco and non-tobacco products                                      | 10.1016/j.toxlet.2018.02.025       | Ind | Tox    | Original | 2018 |
| Modelling the impact of a new tobacco product: review of Philip Morris International's Population Health Impact Model as applied to the IQOS heated tobacco product | 10.1136/tobaccocontrol-2018-054572 | Ind | Health | Original | 2018 |
| Recent findings in the pharmacology of inhaled nicotine: Preclinical and clinical in vivo studies                                                                   | 10.1016/j.neuropharm.2020.108218   | Ind | Tox    | Rev      | 2020 |
| New Tobacco and Tobacco-Related Products: Early Detection of Product Development, Marketing Strategies, and Consumer Interest                                       | 10.2196/publichealth.7359          | Ind | Market | Original | 2018 |
| New tobacco products, old advertising strategies: point-of-sale advertising in Guatemala                                                                            | 10.1136/tobaccocontrol-2020-055681 | Ind | Market | Brief    | 2020 |
| IQOS exposure impairs human airway cell homeostasis: direct comparison with traditional cigarette and e-cigarette                                                   | 10.1183/23120541.00159-2018        | Ind | Tox    | LCPOI    | 2019 |



|                                                                                                                                                                                 |                                    |     |        |          |      |
|---------------------------------------------------------------------------------------------------------------------------------------------------------------------------------|------------------------------------|-----|--------|----------|------|
| Official statement of the Spanish society of pulmonology and thoracic surgery (SEPAR) on electronic cigarettes and IQOS®                                                        | 10.1016/j.arbr.2019.04.007         | Ind | Health | LCPOI    | 2019 |
| PMI reduced-risk claims and upselling of IQOS via Reviti life insurance                                                                                                         | 10.1136/tobaccocontrol-2019-055145 | Ind | Market | LCPOI    | 2019 |
| News Media Presentations of Heated Tobacco Products (HTPs): A Content Analysis of Newspaper and Television News Coverage in South Korea                                         | 10.1080/10810730.2021.1931988      | Ind | Market | Original | 2021 |
| Nicotine Delivery and User Ratings of IQOS Heated Tobacco System Compared With Cigarettes, Juul, and Refillable E-Cigarettes                                                    | 10.1093/ntr/ntab094                | Ind | PAUP   | Original | 2021 |
| Nicotine Delivery to the Aerosol of a Heat-Not-Burn Tobacco Product: Comparison With a Tobacco Cigarette and E-Cigarettes                                                       | 10.1093/ntr/ntx138                 | Ind | Chem   | Original | 2018 |
| Point-of-sale marketing of heated tobacco products in Israel: cause for concern                                                                                                 | 10.1186/s13584-019-0316-6          | Ind | Market | LCPOI    | 2019 |
| Novel tobacco products including electronic cigarette and heated tobacco products increase risk of allergic rhinitis and asthma in adolescents: Analysis of Korean youth survey | 10.1111/all.14212                  | Ind | Health | Original | 2019 |
| Occupational difference in use of heated tobacco products: a cross-sectional analysis of retail workers in Japan                                                                | 10.1136/bmjopen-2021-049395        | Ind | PAUP   | Original | 2021 |

|                                                                                                                                                                |                                        |     |        |          |      |
|----------------------------------------------------------------------------------------------------------------------------------------------------------------|----------------------------------------|-----|--------|----------|------|
| There can be smoke without fire: warranted caution in promoting electronic cigarettes and heat not burn devices as a safer alternative to cigarette smoking    | 10.1183/23120541.001<br>14-2019        | Ind | Market | LCPOI    | 2019 |
| Passive Exposure to Pollutants from a New Generation of Cigarettes in Real Life Scenarios                                                                      | 10.3390/ijerph1710345<br>5             | Ind | Chem   | Original | 2020 |
| Passive exposure to pollutants from conventional cigarettes and new electronic smoking devices (IQOS, e-cigarette) in passenger cars                           | 10.1016/j.ijheh.2019.0<br>1.003        | Ind | Chem   | Original | 2019 |
| Perceived relative harm of heated tobacco products (IQOS), e-cigarettes, and cigarettes among adults in Canada: Findings from the ITC Project                  | 10.18332/TID/127233                    | Ind | PAUP   | Brief    | 2020 |
| Perceptions of Harmfulness of Heated Tobacco Products Compared to Combustible Cigarettes among Adult Smokers in Japan: Findings from the 2018 ITC Japan Survey | 10.3390/ijerph1707239<br>4             | Ind | PAUP   | Original | 2020 |
| Perceptions of heated tobacco products (HTPs) and intention to quit among adult tobacco users in Korea                                                         | 10.2188/jea.JE2020021<br>3             | Ind | PAUP   | Original | 2021 |
| Perceptions of the IQOS Heated Tobacco Product on Twitter in the United States                                                                                 | 10.3389/fcomm.2021.7<br>28604          | Ind | PAUP   | Original | 2021 |
| This should change everything: using the toxic profile of heat-not-burn products as a performance standard to phase out combustible cigarettes                 | 10.1136/tobaccocontro<br>l-2017-054219 | Ind | Policy | LCPOI    | 2019 |

|                                                                                                                                                         |                                        |     |            |          |      |
|---------------------------------------------------------------------------------------------------------------------------------------------------------|----------------------------------------|-----|------------|----------|------|
| A Philip Morris advertisement for its heated tobacco product IQOS sets a troubling precedent                                                            | 10.1136/tobaccocontro<br>l-2019-055363 | Ind | Marke<br>t | LCPOI    | 2020 |
| Effects of combustible tobacco smoking and novel tobacco products on oxidative stress:<br>Different sides of the same coin?                             | 10.1016/j.cotox.2020.0<br>5.001        | Ind | Health     | LCPOI    | 2020 |
| Heated tobacco products for smoking cessation and reducing smoking prevalence                                                                           | 10.1002/14651858.CD0<br>13790          | Ind | Health     | LCPOI    | 2020 |
| IQOS debut in the USA: Philip Morris International's heated tobacco device introduced in<br>Atlanta, Georgia                                            | 10.1136/tobaccocontro<br>l-2019-055488 | Ind | Marke<br>t | LCPOI    | 2020 |
| IQOS is not an acronym: A call to researchers and journals                                                                                              | 10.1136/tobaccocontro<br>l-2019-055571 | Ind | Marke<br>t | LCPOI    | 2020 |
| PMI's heated tobacco products marketing claims of reduced risk and reduced exposure may<br>entice youth to try and continue using these products        | 10.1136/tobaccocontro<br>l-2019-055318 | Ind | PAUP       | Original | 2020 |
| PMI's own in vivo clinical data on biomarkers of potential harm in Americans show that IQOS<br>is not detectably different from conventional cigarettes | 10.1136/tobaccocontro<br>l-2018-054413 | Ind | Health     | Original | 2018 |
| Rapid increase in heated tobacco product (HTP) use from 2015 to 2019: from the Japan<br>'Society and New Tobacco' Internet Survey (JASTIS)              | 10.1136/tobaccocontro<br>l-2020-055652 | Ind | PAUP       | LCPOI    | 2020 |

|                                                                                                                                                                                                                        |                                    |     |        |          |      |
|------------------------------------------------------------------------------------------------------------------------------------------------------------------------------------------------------------------------|------------------------------------|-----|--------|----------|------|
| Study Profile: The Japan "Society and New Tobacco" Internet Survey (JASTIS): A Longitudinal Internet Cohort Study of Heat-Not-Burn Tobacco Products, Electronic Cigarettes, and Conventional Tobacco Products in Japan | 10.2188/jea.JE20190317             | Ind | PAUP   | LCPOI    | 2020 |
| Prevalence and predictors of heated tobacco product use and its relationship with attempts to quit cigarette smoking among Korean adolescents                                                                          | 10.1136/tobaccocontrol-2019-055114 | Ind | PAUP   | Original | 2020 |
| Prevalence and predictors of heated tobacco products use among male ever smokers: results from a Korean longitudinal study                                                                                             | 10.1186/s12889-021-10344-4         | Ind | PAUP   | Original | 2021 |
| Prevalence of heated tobacco product use among adolescents in Taiwan                                                                                                                                                   | 10.1371/journal.pone.0244218       | Ind | PAUP   | Original | 2020 |
| Prevalence, Use Behaviors, and Preferences among Users of Heated Tobacco Products: Findings from the 2018 ITC Japan Survey                                                                                             | 10.3390/ijerph16234630             | Ind | PAUP   | Original | 2019 |
| Profiling the Acute Effects of Modified Risk Products: Evidence from the SUR-VAPES (Sapienza University of Rome-Vascular Assessment of Proatherosclerotic Effects of Smoking) Cluster Study                            | 10.1007/s11883-020-0824-4          | Ind | Health | Original | 2020 |
| Proximity of IQOS and JUUL points of sale to schools in Israel: a geospatial analysis                                                                                                                                  | 10.1136/tobaccocontrol-2021-056718 | Ind | Market | Original | 2021 |
| The Ill Effects of IQOS on Airway Cells: Let's Not Get Burned All Over Again                                                                                                                                           | 10.1165/rcmb.2020-0094LE           | Ind | Health | LCPOI    | 2020 |

|                                                                                                                                                                        |                                    |     |        |          |      |
|------------------------------------------------------------------------------------------------------------------------------------------------------------------------|------------------------------------|-----|--------|----------|------|
| Reasons for Regularly Using Heated Tobacco Products among Adult Current and Former Smokers in Japan: Finding from 2018 ITC Japan Survey                                | 10.3390/ijerph17218030             | Ind | PAUP   | Original | 2020 |
| The Impact of Heated Tobacco Products on Smoking Cessation, Tobacco Use, and Tobacco Sales in South Korea                                                              | 10.4082/kjfm.20.0140               | Ind | PAUP   | Rev      | 2020 |
| Revolution or redux? Assessing IQOS through a precursor product                                                                                                        | 10.1136/tobaccocontrol-2018-054327 | Ind | Market | Original | 2018 |
| Role of diabetes in lung injury from acute exposure to electronic cigarette, heated tobacco product, and combustible cigarette aerosols in an animal model             | 10.1371/journal.pone.0255876       | Ind | Tox    | Original | 2021 |
| Second-hand smoke exposure generated by new electronic devices (IQOS® and e-cigs) and traditional cigarettes: submicron particle behaviour in human respiratory system | 10.7416/ai.2016.2089               | Ind | Chem   | Brief    | 2016 |
| Second-hand smoke generated by combustion and electronic smoking devices used in real scenarios: Ultrafine particle pollution and age-related dose assessment          | 10.1016/j.envint.2017.07.014       | Ind | Chem   | Original | 2017 |
| Simple Determination of Gaseous and Particulate Compounds Generated from Heated Tobacco Products                                                                       | 10.1021/acs.chemrestox.8b00024     | Ind | Chem   | Original | 2018 |
| Smoking E-Cigarette and HEat-noT-burn products: validation of the SECRHET questionnaire                                                                                | 10.7417/ct.2019.2142               | Ind | PAUP   | Original | 2019 |
| Social Response to the FDA Authorization of Heated Tobacco Products (HTPs)                                                                                             | 10.18001/trs.6.1.3                 | Ind | PAUP   | Original | 2020 |

|                                                                                                                                                  |                             |     |        |          |      |
|--------------------------------------------------------------------------------------------------------------------------------------------------|-----------------------------|-----|--------|----------|------|
| The Public Health Standard in Action-Analysis of the US Food and Drug Administration's IQOS Review                                               | 10.1001/jamaoncol.2020.3316 | Ind | Policy | LCPOI    | 2020 |
| Subacute lung injury associated with heated tobacco products                                                                                     | 10.18678/dtfd.896093        | Ind | Health | Brief    | 2021 |
| Targeted characterization of the chemical composition of juul systems aerosol and comparison with 3r4f reference cigarettes and iqos heat sticks | 10.3390/separations8100168  | Ind | Chem   | Original | 2021 |
| The FCTC dilemma on heated tobacco products                                                                                                      | 10.1186/s12992-020-00596-x  | Ind | Policy | Original | 2020 |
| The Frequency of Use and Harm Perception of Heated Tobacco Products (HTPs): The 2019 Cross-Sectional Survey among Medical Students from Poland   | 10.3390/ijerph18073381      | Ind | PAUP   | Original | 2021 |
| US regulator adds to confusion around heated tobacco products                                                                                    | 10.1136/bmj.m3528           | Ind | Policy | LCPOI    | 2020 |
| The impact of heated tobacco products on arterial stiffness                                                                                      | 10.1177/1358863x20943292    | Ind | Health | Brief    | 2020 |
| Exposure to Heated Tobacco Products and Adverse Health Effects, a Systematic Review                                                              | 10.3390/ijerph18126651      | Ind | Health | Rev      | 2021 |
| Alternative tobacco products use and its impact on urologic health - will the lesser evil still be evil? A commentary and review of literature   | 10.5173/ceju.2021.0110      | Ind | Health | LCPOI    | 2021 |

|                                                                                                                                                                      |                                    |     |        |          |      |
|----------------------------------------------------------------------------------------------------------------------------------------------------------------------|------------------------------------|-----|--------|----------|------|
| The Role of Novel (Tobacco) Products on Tobacco Control in Italy                                                                                                     | 10.3390/ijerph18041895             | Ind | Policy | Original | 2021 |
| The trace of airborne particulate matter from smoking e-cigarette, tobacco heating system, conventional and hand-rolled cigarettes in a residential environment      | 10.1007/s11869-019-00760-2         | Ind | Chem   | Original | 2019 |
| The Use of Heated Tobacco Products is Associated with Asthma, Allergic Rhinitis, and Atopic Dermatitis in Korean Adolescents                                         | 10.1038/s41598-019-54102-4         | Ind | Health | Original | 2019 |
| IQOS marketing in the US: The need to study the impact of FDA modified exposure authorization, marketing distribution channels, and potential targeting of consumers | 10.3390/ijerph181910551            | Ind | Market | LCPOI    | 2021 |
| They're heating up: Internet search query trends reveal significant public interest in heat-not-burn tobacco products                                                | 10.1371/journal.pone.0185735       | Ind | PAUP   | Original | 2017 |
| Philip Morris International used the e-cigarette, or vaping, product use associated lung injury (EVALI) outbreak to market IQOS heated tobacco                       | 10.1136/tobaccocontrol-2021-056661 | Ind | Market | LCPOI    | 2021 |
| Tobacco-specific nitrosamines (TSNA) in heated tobacco product IQOS                                                                                                  | 10.1136/tobaccocontrol-2018-054318 | Ind | Chem   | Brief    | 2018 |
| Toxic mechanisms of cigarette smoke and heat-not-burn tobacco vapor inhalation on rheumatoid arthritis                                                               | 10.1016/j.scitotenv.2021.151097    | Ind | Tox    | Original | 2021 |

|                                                                                                                                 |                                    |     |        |          |      |
|---------------------------------------------------------------------------------------------------------------------------------|------------------------------------|-----|--------|----------|------|
| Trends and Patterns of Tobacco and Nicotine Product Use Among Youth in Canada, England, and the United States From 2017 to 2019 | 10.1016/j.jadohealth.2021.02.011   | Ind | PAUP   | Original | 2021 |
| Trends in use of e-cigarette device types and heated tobacco products from 2016 to 2020 in England                              | 10.1038/s41598-021-92617-x         | Ind | PAUP   | Original | 2021 |
| Unboxed: US Young Adult Tobacco Users' Responses to a New Heated Tobacco Product                                                | 10.3390/ijerph17218108             | Ind | PAUP   | Original | 2020 |
| Unburned Tobacco Cigarette Smoke Alters Rat Ultrastructural Lung Airways and DNA                                                | 10.1093/ntr/ntab108                | Ind | Tox    | Original | 2021 |
| PMI New Zealand conflates IQOS heated tobacco products with electronic nicotine delivery systems                                | 10.1136/tobaccocontrol-2021-056964 | Ind | Market | LCPOI    | 2021 |
| USE AND AWARENESS OF HEATED TOBACCO PRODUCTS IN EUROPE                                                                          | 10.2188/jea.JE20200248             | Ind | PAUP   | Brief    | 2021 |
| Use of heated tobacco products in smoke-free locations in Japan: The JASTIS 2019 study                                          | 10.1136/tobaccocontrol-2020-055951 | Ind | PAUP   | Original | 2020 |
| Use of heated tobacco products where their use is prohibited                                                                    | 10.1136/tobaccocontrol-2020-056398 | Ind | PAUP   | Original | 2021 |
| Use of Heated Tobacco Products within Indoor Spaces: Findings from the 2018 ITC Japan Survey                                    | 10.3390/ijerph16234862             | Ind | PAUP   | Original | 2019 |



|                                                                                                                                                                                                       |                                    |       |        |          |      |
|-------------------------------------------------------------------------------------------------------------------------------------------------------------------------------------------------------|------------------------------------|-------|--------|----------|------|
| Use of Multiple Tobacco and Tobacco-Like Products Including Heated Tobacco and E-Cigarettes in Japan: A Cross-Sectional Assessment of the 2017 JASTIS Study                                           | 10.3390/ijerph17062161             | Ind   | PAUP   | Original | 2020 |
| Vascular endothelial function is impaired by aerosol from a single IQOS HeatStick to the same extent as by cigarette smoke                                                                            | 10.1136/tobaccocontrol-2018-054325 | Ind   | Tox    | Original | 2018 |
| What Is Accounting for the Rapid Decline in Cigarette Sales in Japan?                                                                                                                                 | 10.3390/ijerph17103570             | Ind   | Market | Original | 2020 |
| Workplace smoke-free policies that allow heated tobacco products and electronic cigarettes use are associated with use of both these products and conventional tobacco smoking: the 2018 JASTIS study | 10.1136/tobaccocontrol-2019-055465 | Ind   | PAUP   | Original | 2020 |
| Young Adult Correlates of IQOS Curiosity, Interest, and Likelihood of Use                                                                                                                             | 10.18001/trs.6.2.1                 | Ind   | PAUP   | Original | 2020 |
| A cross-category puffing topography, mouth level exposure and consumption study among Italian users of tobacco and nicotine products                                                                  | 10.1038/s41598-019-55410-5         | Other | PAUP   | Original | 2020 |
| Accurate measurement of main aerosol constituents from heated tobacco products (HTPs): Implications for a fundamentally different aerosol                                                             | 10.1016/j.yrtph.2018.09.016        | Other | Chem   | Original | 2018 |
| Changes in Biomarkers of Exposure on Switching From a Conventional Cigarette to Tobacco Heating Products: A Randomized, Controlled Study in Healthy Japanese Subjects                                 | 10.1093/ntr/nty104                 | Other | Health | Original | 2019 |
| Comparative study of the effects of cigarette smoke versus next generation tobacco and nicotine product extracts on endothelial function                                                              | 10.1016/j.redox.2021.102150        | Other | Tox    | Original | 2021 |

|                                                                                                                                                                                      |                                                                                                 |       |        |          |      |
|--------------------------------------------------------------------------------------------------------------------------------------------------------------------------------------|-------------------------------------------------------------------------------------------------|-------|--------|----------|------|
| Cross-sectional survey to assess tobacco and nicotine product use since the introduction of tobacco heating products in japan: Wave 1                                                | 10.18001/TRS.7.3.6                                                                              | Other | PAUP   | Original | 2021 |
| In vitro RNA-seq-based toxicogenomics assessment shows reduced biological effect of tobacco heating products when compared to cigarette smoke                                        | 10.1038/s41598-018-19627-0                                                                      | Other | Tox    | Original | 2018 |
| Results from a 2018 cross-sectional survey in Tokyo, Osaka and Sendai to assess tobacco and nicotine product usage after the introduction of heated tobacco products (HTPs) in Japan | 10.1186/s12954-020-00374-3                                                                      | Other | PAUP   | Original | 2020 |
| Systematic review of biomarker findings from clinical studies of electronic cigarettes and heated tobacco products                                                                   | 10.1016/j.toxrep.2021.01.014                                                                    | Other | Health | Rev      | 2021 |
| The use of human induced pluripotent stem cells to screen for developmental toxicity potential indicates reduced potential for non-combusted products, when compared to cigarettes   | 10.1016/j.crtox.2020.11.001                                                                     | Other | Tox    | Original | 2020 |
| 3-D Nasal Cultures: Systems Toxicological Assessment of a Candidate Modified-Risk Tobacco Product                                                                                    | 10.14573/altex.1605041                                                                          | PMI   | Tox    | Original | 2017 |
| A Comparative Study of Non-Volatile Compounds Present in 3R4F Cigarettes and iQOS Heatsticks Utilizing GC-MS                                                                         | <a href="https://doi.org/10.4236/ajac.2019.103007">https://doi.org/10.4236/ajac.2019.103007</a> | PMI   | Chem   | Original | 2019 |
| A comprehensive study on the leaching of metals from heated tobacco sticks and cigarettes in water and natural waters                                                                | 10.1016/j.scitotenv.2020.136700                                                                 | PMI   | Chem   | Original | 2020 |

|                                                                                                                                                                                                                                           |                                   |     |        |          |      |
|-------------------------------------------------------------------------------------------------------------------------------------------------------------------------------------------------------------------------------------------|-----------------------------------|-----|--------|----------|------|
| A Meta-Analysis of the Performance of a Blood-Based Exposure Response Gene Signature Across Clinical Studies on the Tobacco Heating System 2.2 (THS 2.2)                                                                                  | 10.3389/fphar.2019.00198          | PMI | Health | Original | 2019 |
| A review of the impacts of tobacco heating system on indoor air quality versus conventional pollution sources                                                                                                                             | 10.1016/j.chemosphere.2018.05.039 | PMI | Chem   | Rev      | 2018 |
| A Screening Method by Gas Chromatography-Mass Spectrometry for the Quantification of 24 Aerosol Constituents from Heat-Not-Burn Tobacco Products                                                                                          | 10.2478/cttr-2019-0013            | PMI | Chem   | Original | 2019 |
| A six-month systems toxicology inhalation/cessation study in ApoE(-/-) mice to investigate cardiovascular and respiratory exposure effects of modified risk tobacco products, CHTP 1.2 and THS 2.2, compared with conventional cigarettes | 10.1016/j.fct.2019.02.008         | PMI | Tox    | Original | 2019 |
| A systems toxicology approach for comparative assessment: Biological impact of an aerosol from a candidate modified-risk tobacco product and cigarette smoke on human organotypic bronchial epithelial cultures                           | 10.1016/j.tiv.2016.11.009         | PMI | Tox    | Original | 2017 |
| Aerosol from a candidate modified risk tobacco product has reduced effects on chemotaxis and transendothelial migration compared to combustion of conventional cigarettes                                                                 | 10.1016/j.fct.2015.09.016         | PMI | Tox    | Original | 2015 |
| Aerosol from Tobacco Heating System 2.2 has reduced impact on mouse heart gene expression compared with cigarette smoke                                                                                                                   | 10.1016/j.fct.2017.01.013         | PMI | Tox    | Original | 2017 |
| Air quality assessment of the Tobacco Heating System 2.2 under simulated residential conditions                                                                                                                                           | 10.1007/s11869-019-00697-6        | PMI | Chem   | Original | 2019 |

|                                                                                                                                                                                                                                                                        |                                   |     |        |          |      |
|------------------------------------------------------------------------------------------------------------------------------------------------------------------------------------------------------------------------------------------------------------------------|-----------------------------------|-----|--------|----------|------|
| An 8-Month Systems Toxicology Inhalation/Cessation Study in Apoe-/- Mice to Investigate Cardiovascular and Respiratory Exposure Effects of a Candidate Modified Risk Tobacco Product, THS 2.2, Compared With Conventional Cigarettes                                   | 10.1093/toxsci/kfv243             | PMI | Tox    | Original | 2016 |
| An experimental investigation into the operation of an electrically heated tobacco system                                                                                                                                                                              | 10.1016/j.tca.2019.178<br>475     | PMI | Chem   | Original | 2020 |
| Analysis of chemical deposits on tooth enamel exposed to total particulate matter from cigarette smoke and tobacco heating system 2.2 aerosol by novel GC-MS deconvolution procedures                                                                                  | 10.1016/j.jchromb.202<br>0.122228 | PMI | Chem   | Original | 2020 |
| Assessment of the reduction in levels of exposure to harmful and potentially harmful constituents in Japanese subjects using a novel tobacco heating system compared with conventional cigarettes and smoking abstinence: A randomized controlled study in confinement | 10.1016/j.yrtph.2016.0<br>9.014   | PMI | Health | Original | 2016 |
| Biomarker of exposure level data set in smokers switching from conventional cigarettes to Tobacco Heating System 2.2, continuing smoking or abstaining from smoking for 5 days                                                                                         | 10.1016/j.dib.2016.11.<br>047     | PMI | Health | Original | 2017 |
| Comparative assessment of HPHC yields in the Tobacco Heating System THS2.2 and commercial cigarettes                                                                                                                                                                   | 10.1016/j.yrtph.2017.0<br>8.006   | PMI | Chem   | Original | 2017 |
| Comparative effects of a candidate modified-risk tobacco product Aerosol and cigarette smoke on human organotypic small airway cultures: a systems toxicology approach                                                                                                 | 10.1039/c7tx00152e                | PMI | Tox    | Original | 2017 |

|                                                                                                                                                                                                          |                               |     |        |          |      |
|----------------------------------------------------------------------------------------------------------------------------------------------------------------------------------------------------------|-------------------------------|-----|--------|----------|------|
| Comparative systems toxicology analysis of cigarette smoke and aerosol from a candidate modified risk tobacco product in organotypic human gingival epithelial cultures: A 3-day repeated exposure study | 10.1016/j.fct.2016.12.027     | PMI | Tox    | Original | 2017 |
| Comparative systems toxicology assessment of the Tobacco Heating System 2.2 and reference cigarettes (3R4F), on human organotypic respiratory tissue cultures                                            | 10.1016/j.toxlet.2016.06.1588 | PMI | Tox    | Original | 2016 |
| Comparing the preclinical risk profile of inhalable candidate and potential candidate modified risk tobacco products: A bridging use case                                                                | 10.1016/j.toxrep.2020.09.004  | PMI | Health | Original | 2020 |
| Comparison of monoamine oxidase inhibition by cigarettes and modified risk tobacco products                                                                                                              | 10.1016/j.toxrep.2019.11.008  | PMI | Tox    | Original | 2019 |
| Comparison of the impact of the Tobacco Heating System 2.2 and a cigarette on indoor air quality                                                                                                         | 10.1016/j.yrtph.2016.06.005   | PMI | Chem   | Original | 2016 |
| Comparison of the Pharmacokinetics of Nicotine Following Single and Ad Libitum Use of a Tobacco Heating System or Combustible Cigarettes                                                                 | 10.1093/ntr/ntv220            | PMI | Health | Original | 2016 |
| Comprehensive air quality assessment of the tobacco heating system 2.2 under simulated indoor environments                                                                                               | 10.3390/atmos12080989         | PMI | Chem   | Original | 2021 |
| Comprehensive chemical characterization of the aerosol generated by a heated tobacco product by untargeted screening                                                                                     | 10.1007/s00216-020-02502-1    | PMI | Chem   | Original | 2020 |

|                                                                                                                                                                                                     |                                |     |        |          |      |
|-----------------------------------------------------------------------------------------------------------------------------------------------------------------------------------------------------|--------------------------------|-----|--------|----------|------|
| Crowd-Sourced Verification of Computational Methods and Data in Systems Toxicology: A Case Study with a Heat-Not-Burn Candidate Modified Risk Tobacco Product                                       | 10.1021/acs.chemrestox.6b00345 | PMI | Tox    | Original | 2017 |
| Determination of eight carbonyl compounds in aerosols trapped in phosphate buffer saline solutions to support in vitro assessment studies                                                           | 10.1016/j.talanta.2018.02.048  | PMI | Chem   | Original | 2018 |
| Development and validation of a method for quantification of two tobacco-specific nitrosamines in indoor air                                                                                        | 10.1016/j.chroma.2018.10.037   | PMI | Chem   | Original | 2018 |
| Development of Models for the Estimation of Mouth Level Exposure to Aerosol Constituents from a Heat-Not-Burn Tobacco Product Using Mouthpiece Analysis                                             | 10.1515/cttr-2017-0005         | PMI | Chem   | Original | 2017 |
| Effect of Switching to the Tobacco Heating System Versus Continued Cigarette Smoking on Chronic Generalized Periodontitis Treatment Outcome: Protocol for a Randomized Controlled Multicenter Study | 10.2196/15350                  | PMI | Health | Original | 2021 |
| Effects of cigarette smoke and tobacco heating aerosol on color stability of dental enamel, dentin, and composite resin restorations                                                                | 10.3290/j.qi.a41601            | PMI | Health | Original | 2019 |
| Effects of cigarette smoke, cessation and switching to a candidate modified risk tobacco product on the liver in Apoe(-/-) mice - a systems toxicology analysis                                     | 10.3109/08958378.2016.1150368  | PMI | Tox    | Original | 2016 |
| Effects of Cigarette Smoke, Cessation, and Switching to Two Heat-Not-Burn Tobacco Products on Lung Lipid Metabolism in C57BL/6 and Apoe-/- Mice-An Integrative Systems Toxicology Analysis          | 10.1093/toxsci/kfv244          | PMI | Tox    | Original | 2016 |

|                                                                                                                                                                                                                                                                            |                               |     |        |          |      |
|----------------------------------------------------------------------------------------------------------------------------------------------------------------------------------------------------------------------------------------------------------------------------|-------------------------------|-----|--------|----------|------|
| Effects of Switching to a Heat-Not-Burn Tobacco Product on Biologically Relevant Biomarkers to Assess a Candidate Modified Risk Tobacco Product: A Randomized Trial                                                                                                        | 10.1158/1055-9965.epi-18-0915 | PMI | Health | Original | 2019 |
| Effects of Switching to the Menthol Tobacco Heating System 2.2, Smoking Abstinence, or Continued Cigarette Smoking on Clinically Relevant Risk Markers: A Randomized, Controlled, Open-Label, Multicenter Study in Sequential Confinement and Ambulatory Settings (Part 2) | 10.1093/ntr/ntx028            | PMI | Health | Original | 2018 |
| Effects of Switching to the Tobacco Heating System 2.2 Menthol, Smoking Abstinence, or Continued Cigarette Smoking on Biomarkers of Exposure: A Randomized, Controlled, Open-Label, Multicenter Study in Sequential Confinement and Ambulatory Settings (Part 1)           | 10.1093/ntr/ntw287            | PMI | Health | Original | 2018 |
| Estimating the population health impact of introducing a reduced-risk tobacco product into Japan. The effect of differing assumptions, and some comparisons with the U.S                                                                                                   | 10.1016/j.yrtph.2018.10.010   | PMI | PAUP   | Original | 2018 |
| Evaluation of Biological and Functional Changes in Healthy Smokers Switching to the Tobacco Heating System 2.2 Versus Continued Tobacco Smoking: Protocol for a Randomized, Controlled, Multicenter Study                                                                  | 10.2196/11294                 | PMI | Health | LCPOI    | 2018 |
| Evaluation of the Tobacco Heating System 2.2 (THS2.2). Part 5: microRNA expression from a 90-day rat inhalation study indicates that exposure to THS2.2 aerosol causes reduced effects on lung tissue compared with cigarette smoke                                        | 10.1016/j.yrtph.2016.11.018   | PMI | Tox    | Original | 2016 |
| Evaluation of the Tobacco Heating System 2.2. Part 1: Description of the system and the scientific assessment program                                                                                                                                                      | 10.1016/j.yrtph.2016.07.006   | PMI | Policy | Original | 2016 |

|                                                                                                                                                                                                                                                           |                                 |     |        |          |      |
|-----------------------------------------------------------------------------------------------------------------------------------------------------------------------------------------------------------------------------------------------------------|---------------------------------|-----|--------|----------|------|
| Evaluation of the Tobacco Heating System 2.2. Part 2: Chemical composition, genotoxicity, cytotoxicity, and physical properties of the aerosol                                                                                                            | 10.1016/j.yrtph.2016.1<br>0.001 | PMI | Chem   | Original | 2016 |
| Evaluation of the Tobacco Heating System 2.2. Part 3: Influence of the tobacco blend on the formation of harmful and potentially harmful constituents of the Tobacco Heating System 2.2 aerosol                                                           | 10.1016/j.yrtph.2016.1<br>0.016 | PMI | Chem   | Original | 2016 |
| Evaluation of the Tobacco Heating System 2.2. Part 4: 90-day OECD 413 rat inhalation study with systems toxicology endpoints demonstrates reduced exposure effects compared with cigarette smoke                                                          | 10.1016/j.yrtph.2016.1<br>0.015 | PMI | Tox    | Original | 2016 |
| Evaluation of the Tobacco Heating System 2.2. Part 6: 90-day OECD 413 rat inhalation study with systems toxicology endpoints demonstrates reduced exposure effects of a mentholated version compared with mentholated and non-mentholated cigarette smoke | 10.1016/j.yrtph.2016.1<br>1.004 | PMI | Tox    | Original | 2016 |
| Evaluation of the Tobacco Heating System 2.2. Part 7: Systems toxicological assessment of a mentholated version revealed reduced cellular and molecular exposure effects compared with mentholated and non-mentholated cigarette smoke                    | 10.1016/j.yrtph.2016.1<br>1.001 | PMI | Tox    | Original | 2016 |
| Evaluation of the Tobacco Heating System 2.2. Part 8: 5-Day randomized reduced exposure clinical study in Poland                                                                                                                                          | 10.1016/j.yrtph.2016.1<br>1.003 | PMI | Health | Original | 2016 |
| Evaluation of the tobacco heating system 2.2. Part 9: Application of systems pharmacology to identify exposure response markers in peripheral blood of smokers switching to THS2.2                                                                        | 10.1016/j.yrtph.2016.1<br>1.011 | PMI | Health | Original | 2016 |



|                                                                                                                                                                                                                                                                                           |                                    |     |        |          |      |
|-------------------------------------------------------------------------------------------------------------------------------------------------------------------------------------------------------------------------------------------------------------------------------------------|------------------------------------|-----|--------|----------|------|
| Favorable Changes in Biomarkers of Potential Harm to Reduce the Adverse Health Effects of Smoking in Smokers Switching to the Menthol Tobacco Heating System 2.2 for 3 Months (Part 2)                                                                                                    | 10.1093/ntr/ntz084                 | PMI | Health | Original | 2020 |
| Household Surveys in the General Population and Web-Based Surveys in IQOS Users Registered at the Philip Morris International IQOS User Database: Protocols on the Use of Tobacco- and Nicotine-Containing Products in Germany, Italy, and the United Kingdom (Greater London), 2018-2020 | 10.2196/12061                      | PMI | PAUP   | LCPOI    | 2019 |
| Impact of switching to a heat-not-burn tobacco product on CYP1A2 activity                                                                                                                                                                                                                 | 10.1016/j.toxrep.2020.10.017       | PMI | Tox    | Original | 2020 |
| Impact of using a tobacco heating system (THS) on indoor air quality in a nightclub                                                                                                                                                                                                       | 10.4209/aaqr.2019.04.0211          | PMI | Chem   | Original | 2019 |
| Impacts of exhaled aerosol from the usage of the tobacco heating system to indoor air quality: A chamber study                                                                                                                                                                            | 10.1016/j.chemospher.e.2019.02.095 | PMI | Chem   | Original | 2019 |
| In Vitro Systems Toxicology Assessment of a Candidate Modified Risk Tobacco Product Shows Reduced Toxicity Compared to That of a Conventional Cigarette                                                                                                                                   | 10.1021/acs.chemrestox.5b00321     | PMI | Tox    | Original | 2016 |
| Innovative methodology based on the thermo-denuder principle for the detection of combustion-related solid particles or high boiling point droplets: Application to 3R4F cigarette and the Tobacco Heating System THS 2.2                                                                 | 10.1016/j.jaerosci.2017.12.011     | PMI | Chem   | Original | 2018 |

|                                                                                                                                                                                            |                              |     |        |          |      |
|--------------------------------------------------------------------------------------------------------------------------------------------------------------------------------------------|------------------------------|-----|--------|----------|------|
| Investigating a toxic risk (self-inflicted) the example of conventional and advanced studies of a novel Tobacco Heating System                                                             | 10.1016/j.yrtph.2016.07.020  | PMI | Tox    | LCPOI    | 2016 |
| Investigation and comparison of the transfer of TSNA from tobacco to cigarette mainstream smoke and to the aerosol of a heated tobacco product, THS2.2                                     | 10.1016/j.yrtph.2018.06.011  | PMI | Chem   | Original | 2018 |
| Investigation into the presence or absence of solid particles generated from thermal processes in the aerosol from an electrically heated tobacco product with and without filter elements | 10.4209/AAQR.200667          | PMI | Chem   | Original | 2021 |
| Investigation of menthol content and transfer rates in cigarettes and Tobacco Heating System 2.2                                                                                           | 10.1016/j.yrtph.2018.11.004  | PMI | Chem   | Original | 2019 |
| Investigation of solid particles in the mainstream aerosol of the Tobacco Heating System THS2.2 and mainstream smoke of a 3R4F reference cigarette                                         | 10.1177/0960327116681653     | PMI | Chem   | Original | 2017 |
| Lung Function in Users of a Smoke-Free Electronic Device With HeatSticks (iQOS) Versus Smokers of Conventional Cigarettes: Protocol for a Longitudinal Cohort Observational Study          | 10.2196/10006                | PMI | Health | LCPOI    | 2018 |
| Mainstream smoke constituents and in vitro toxicity comparative analysis of 3R4F and 1R6F reference cigarettes                                                                             | 10.1016/j.toxrep.2019.02.009 | PMI | Chem   | Original | 2019 |
| Mitochondrial Network and Biogenesis in Response to Short and Long-Term Exposure of Human BEAS-2B Cells to Aerosol Extracts from the Tobacco Heating System 2.2                            | 10.33594/000000216           | PMI | Tox    | Original | 2020 |

|                                                                                                                                                                                                                                                                     |                                 |     |        |          |      |
|---------------------------------------------------------------------------------------------------------------------------------------------------------------------------------------------------------------------------------------------------------------------|---------------------------------|-----|--------|----------|------|
| Impact of 6-Month Exposure to Aerosols From Potential Modified Risk Tobacco Products Relative to Cigarette Smoke on the Rodent Gastrointestinal Tract                                                                                                               | 10.3389/fmicb.2021.587745       | PMI | Tox    | Original | 2021 |
| Multi-omics systems toxicology study of mouse lung assessing the effects of aerosols from two heat-not-burn tobacco products and cigarette smoke                                                                                                                    | 10.1016/j.csbj.2020.04.011      | PMI | Tox    | Original | 2020 |
| Nicotine pharmacokinetic profiles of the Tobacco Heating System 2.2, cigarettes and nicotine gum in Japanese smokers                                                                                                                                                | 10.1016/j.yrtph.2017.07.032     | PMI | Health | Original | 2017 |
| Non-inferiority trial comparing cigarette consumption, adoption rates, acceptability, tolerability, and tobacco harm reduction potential in smokers switching to Heated Tobacco Products or electronic cigarettes: Study protocol for a randomized controlled trial | 10.1016/j.conctc.2020.100518    | PMI | PAUP   | Original | 2020 |
| Perplexing Conclusions Concerning Heat-Not-Burn Tobacco Cigarettes                                                                                                                                                                                                  | 10.1001/jamainternmed.2017.5840 | PMI | Chem   | LCPOI    | 2017 |
| Potential predictors of adoption of the Tobacco Heating System by U.S. adult smokers: An actual use study                                                                                                                                                           | 10.12688/f1000research.17606.1  | PMI | PAUP   | Original | 2019 |
| Reduced Chronic Toxicity and Carcinogenicity in A/J Mice in Response to Life-Time Exposure to Aerosol from a Heated Tobacco Product Compared with Cigarette Smoke                                                                                                   | 10.1093/toxsci/kfaa131          | PMI | Tox    | Original | 2020 |
| Reduced Exposure to Harmful and Potentially Harmful Smoke Constituents With the Tobacco Heating System 2.1                                                                                                                                                          | 10.1093/ntr/ntw164              | PMI | Health | Original | 2017 |

|                                                                                                                                                                                                                                                               |                                |     |        |          |      |
|---------------------------------------------------------------------------------------------------------------------------------------------------------------------------------------------------------------------------------------------------------------|--------------------------------|-----|--------|----------|------|
| Reduction in Exposure to Selected Harmful and Potentially Harmful Constituents Approaching Those Observed Upon Smoking Abstinence in Smokers Switching to the Menthol Tobacco Heating System 2.2 for 3 Months (Part 1)                                        | 10.1093/ntr/ntz013             | PMI | Health | Original | 2020 |
| Respiratory effects of exposure to aerosol from the candidate modified-risk tobacco product THS 2.2 in an 18-month systems toxicology study with A/J mice                                                                                                     | 10.1093/toxsci/kfaa132         | PMI | Tox    | Original | 2020 |
| Robustness of HPHC reduction for THS 2.2 aerosol compared with 3R4f reference cigarette smoke under high intensity puffing conditions                                                                                                                         | 10.2478/cttr-2020-0008         | PMI | Chem   | Original | 2020 |
| Robustness of HPHC Reduction in THS 2.2 Aerosol Relative to 3R4F Reference Cigarette Smoke under Extreme Climatic Conditions                                                                                                                                  | 10.2478/cttr-2021-0008         | PMI | Chem   | Original | 2021 |
| Role of testing standards in smoke-free product assessments                                                                                                                                                                                                   | 10.1016/j.yrtph.2018.06.021    | PMI | Chem   | Original | 2018 |
| Structural, functional, and molecular impact on the cardiovascular system in ApoE(-/-) mice exposed to aerosol from candidate modified risk tobacco products, Carbon Heated Tobacco Product 1.2 and Tobacco Heating System 2.2, compared with cigarette smoke | 10.1016/j.cbi.2019.108887      | PMI | Tox    | Original | 2020 |
| Systems Toxicology Assessment of the Biological Impact of a Candidate Modified Risk Tobacco Product on Human Organotypic Oral Epithelial Cultures                                                                                                             | 10.1021/acs.chemrestox.6b00174 | PMI | Tox    | Original | 2016 |
| Systems toxicology meta-analysis of in vitro assessment studies: biological impact of a candidate modified-risk tobacco product aerosol compared with cigarette smoke on human organotypic cultures of the aerodigestive tract                                | 10.1039/c7tx00047b             | PMI | Tox    | Original | 2017 |

|                                                                                                                                                                                                 |                               |     |      |          |      |
|-------------------------------------------------------------------------------------------------------------------------------------------------------------------------------------------------|-------------------------------|-----|------|----------|------|
| Systems toxicology study reveals reduced impact of heated tobacco product aerosol extract relative to cigarette smoke on premature aging and exacerbation effects in aged aortic cells in vitro | 10.1007/s00204-021-03123-y    | PMI | Tox  | Original | 2021 |
| Systems toxicology-based assessment of the candidate modified risk tobacco product THS2.2 for the adhesion of monocytic cells to human coronary arterial endothelial cells                      | 10.1016/j.tox.2015.11.007     | PMI | Tox  | Original | 2016 |
| The biological effects of long-term exposure of human bronchial epithelial cells to total particulate matter from a candidate modified-risk tobacco product                                     | 10.1016/j.tiv.2018.02.019     | PMI | Tox  | Original | 2018 |
| Tobacco Heating System 2.2 has a limited impact on DNA methylation of candidate enhancers in mouse lung compared with cigarette smoke                                                           | 10.1016/j.fct.2018.11.020     | PMI | Tox  | Original | 2019 |
| Toxicological assessment of Tobacco Heating System 2.2: Findings from an independent peer review                                                                                                | 10.1016/j.yrtph.2019.03.007   | PMI | Tox  | Original | 2019 |
| UV-254 degradation of nicotine in natural waters and leachates produced from cigarette butts and heat-not-burn tobacco products                                                                 | 10.1016/j.envres.2020.110695  | PMI | Chem | Original | 2021 |
| Validation of selected analytical methods using accuracy profiles to assess the impact of a Tobacco Heating System on indoor air quality                                                        | 10.1016/j.talanta.2016.05.022 | PMI | Chem | Original | 2016 |

**Table S3.** Yields of nicotine, formaldehyde, acetaldehyde, and acrolein in the aerosols of IQOS with different flavored sticks compared to smoke of tobacco cigarettes under a variety of puffing regimes.

| Reference             | Affiliation/funding | Puff Duration (sec) | Inter-Puff-Interval (sec) | Puff Volume (mL) | Item   | Nicotine (mg/item) | Formaldehyde (ug/item) | Acetaldehyde (ug/item) | Acrolein (ug/item) |
|-----------------------|---------------------|---------------------|---------------------------|------------------|--------|--------------------|------------------------|------------------------|--------------------|
| Schaller et al. 2016a | PMI                 |                     |                           |                  | IQOS-R | 1.32 ± 0.16        | 5.53 ± 0.69            | 219.00 ± 31.00         | 11.30 ± 2.36       |
|                       |                     |                     |                           |                  | IQOS-M | 1.21 ± 0.09        | 4.55 ± 0.25            | 205.00 ± 12.00         | 9.15 ± 0.43        |
|                       |                     |                     |                           |                  | 3R4F   | 1.89 ± 0.16        | 56.5 ± 12.1            | 1555.00 ± 184.00       | 154.00 ± 20.00     |
|                       |                     |                     |                           |                  | IQOS-R | 0.49 ± 0.08        | 1.85 ± 0.24            | 149.00 ± 10.00         | 4.89 ± 0.74        |
|                       |                     | 2.4                 | 25                        | 60               | IQOS-R | 1.64 ± 0.22        | 4.62 ± 0.45            | 205.00 ± 10.00         | 10.63 ± 0.74       |
|                       |                     | 2.4                 | 25                        | 80               | IQOS-R | 1.80 ± 0.41        | 5.34 ± 0.53            | 203.00 ± 12.00         | 10.74 ± 0.56       |
|                       |                     | 4.5                 | 22                        | 110              | IQOS-R | 2.19 ± 0.43        | 7.73 ± 1.02            | 185.00 ± 20.00         | 12.90 ± 2.09       |
|                       |                     | 2.4                 | 30                        | 40               | IQOS-R | 0.76 ± 0.19        | 2.07 ± 0.53            | 145.00 ± 11.00         | 5.18 ± 0.43        |
|                       |                     | 2.4                 | 30                        | 80               | IQOS-R | 1.13 ± 0.11        | 3.12 ± 0.34            | 148.00 ± 14.00         | 5.07 ± 0.32        |
| Schaller et al. 2016b | PMI                 |                     |                           |                  | IQOS-R | 1.38 ± 0.20        | 10.16 ± 10.08          | 211.00 ± 60.00         | 10.96 ± 5.16       |
|                       |                     |                     |                           |                  | 3R4F   | 1.88               | 88.90                  | 1694.00                | 161.00             |
| Jaccard et al. 2017   | PMI                 |                     |                           |                  | IQOS-R | 1.14 ± 0.03        | 7.98 ± 0.50            | 217.00 ± 7.85          | 9.63 ± 0.70        |
|                       |                     |                     |                           |                  | 3R4F   | 1.86 ± 0.17        | 85.20 ± 16.70          | 1641.00 ± 258.00       | 156.00 ± 25.40     |

|                        |     |     |     |     |        |             |             |                |              |
|------------------------|-----|-----|-----|-----|--------|-------------|-------------|----------------|--------------|
| Poget et al. 2017      | PMI |     | HCI |     | IQOS-R | 1.36 ± 0.09 |             |                |              |
|                        |     |     | ISO |     | IQOS-R | 0.49 ± 0.04 |             |                |              |
|                        |     | 2.4 | 25  | 60  | IQOS-R | 1.64 ± 0.10 |             |                |              |
|                        |     | 2.4 | 25  | 80  | IQOS-R | 1.80 ± 0.19 |             |                |              |
|                        |     | 4.5 | 22  | 110 | IQOS-R | 2.19 ± 0.20 |             |                |              |
|                        |     | 2.4 | 30  | 40  | IQOS-R | 0.76 ± 0.09 |             |                |              |
|                        |     | 2.4 | 30  | 80  | IQOS-R | 1.13 ± 0.05 |             |                |              |
| Ibanez et al. 2019     | PMI |     | HCI |     | IQOS-R | 1.15 ± 0.02 |             |                |              |
|                        |     |     | HCI |     | 3R4F   | 2.26 ± 0.06 |             |                |              |
| Bentley et al. 2020    | PMI |     | HCI |     | IQOS-R | 313.00      | 5.20        |                |              |
|                        |     |     | HCI |     | 3R4F   | 1253.00     | 463.00      |                |              |
| Gasparyan et al. 2018  | BAT |     | HCI |     | IQOS-R | 1.23 ± 0.05 |             |                |              |
| Auer et al. 2017       | Ind |     | ISO |     | IQOS-R | 0.30 ± 0.21 | 3.20 ± 2.70 | 133.00 ± 35.00 | 0.90 ± 0.60  |
|                        |     |     | ISO |     | LSBL   | 0.36        | 4.30 ± 0.40 | 610.00         | 1.10         |
| Bekki et al. 2017      | Ind |     | HCI |     | IQOS-R | 1.10        |             |                |              |
|                        |     |     | HCI |     | IQOS-M | 1.20        |             |                |              |
|                        |     |     | HCI |     | 1R5F   | 1.00        |             |                |              |
|                        |     |     | HCI |     | 3R4F   | 1.70        |             |                |              |
| Farsalinos et al. 2018 | Ind |     | HCI |     | IQOS-R | 1.40 ± 0.16 |             |                |              |
|                        |     |     | HCI |     | IQOS-M | 1.38 ± 0.11 |             |                |              |
|                        |     |     | HCI |     | Marlb  | 1.99 ± 0.20 |             |                |              |
|                        |     | 4   | 30  | 55  | IQOS-R | 1.41 ± 0.08 |             |                |              |
|                        |     | 4   | 30  | 55  | IQOS-M | 1.43 ± 0.13 |             |                |              |
| Farsalinos et al. 2018 | Ind |     | HCI |     | IQOS-R | 1.20        | 6.40 ± 1.80 | 144.10 ± 23.30 | 10.80 ± 4.00 |
|                        |     |     | HCI |     | IQOS-M | 1.20        | 5.00 ± 1.40 | 176.70 ± 32.60 | 10.40 ± 1.90 |

|                      |     |     |         |             |                |                  |                  |
|----------------------|-----|-----|---------|-------------|----------------|------------------|------------------|
|                      |     | HCI | Marlb   | 1.80        | 67.20 ± 14.00  | 1062.20 ± 161.40 | 112.70 ± 14.20   |
|                      | 3   | 30  | 80      | IQOS-R      | 1.30           | 9.10 ± 3.70      | 146.80 ± 22.30   |
|                      | 3   | 30  | 80      | IQOS-M      | 1.30           | 13.60 ± 5.30     | 187.80 ± 61.80   |
|                      | 3   | 30  | 80      | Marlb       | 2.10           | 74.40 ± 24.20    | 1372.90 ± 191.20 |
|                      | 3   | 25  | 90      | IQOS-R      | 1.60           | 17.10 ± 2.40     | 165.10 ± 10.50   |
|                      | 3   | 25  | 90      | IQOS-M      | 1.70           | 22.60 ± 4.80     | 187.10 ± 13.40   |
|                      | 3   | 25  | 90      | Marlb       | 2.40           | 71.40 ± 15.40    | 1212.60 ± 144.20 |
| Leigh et al. 2018    | Ind | HCI | IQOS-R  | 1.40 ± 0.20 |                |                  |                  |
|                      |     | HCI | Marlb   | 2.10 ± 0.10 |                |                  |                  |
|                      |     | HCI | IQOS-R  | 1.10 ± 0.10 | 5.30 ± 0.40    | 179.40 ± 10.50   | 9.90 ± 1.20      |
| Mallock et al. 2018  | Ind | HCI | Min-Cig | 1.07 ± 0.06 | 29.30 ± 3.80   | 930.00 ± 85.00   | 89.20 ± 7.30     |
|                      |     | HCI | Max-Cig | 2.70 ± 0.14 | 130.30 ± 10.80 | 1540.00 ± 153.00 | 154.10 ± 13.60   |
|                      |     | HCI | IQOS-R  | 1.20 ± 0.13 | 4.80 ± 1.00    | 190.00 ± 16.00   | 7.30 ± 1.10      |
|                      |     | HCI | IQOS-M  | 1.20 ± 0.03 | 6.20 ± 0.63    | 210.00 ± 5.10    | 8.20 ± 0.83      |
| Uchiyama et al. 2018 | Ind | HCI | IQOS-Mn | 1.20 ± 0.17 | 6.00 ± 0.86    | 230.00 ± 9.90    | 8.30 ± 0.86      |
|                      |     | HCI | 1R5F    | 1.10 ± 0.17 | 25.00 ± 0.75   | 1300.00 ± 88.00  | 110.00 ± 6.80    |
|                      |     | HCI | 3R4F    | 2.1 ± 0.12  | 41.00 ± 2.70   | 1500.00 ± 19.00  | 130.00 ± 6.50    |



|                           |     |     |         |             |              |                 |               |  |
|---------------------------|-----|-----|---------|-------------|--------------|-----------------|---------------|--|
|                           |     | HCI | CM6     | 2.60 ± 0.26 | 42.00 ± 4.00 | 1200.00 ± 12.00 | 100.00 ± 4.50 |  |
|                           |     | ISO | IQOS-R  | 0.40 ± 0.07 | 3.40 ± 0.23  | 150.00 ± 7.00   | 4.00 ± 0.62   |  |
|                           |     | ISO | IQOS-M  | 0.43 ± 0.08 | 2.60 ± 0.34  | 150.00 ± 8.30   | 3.90 ± 0.61   |  |
|                           |     | ISO | IQOS-Mn | 0.32 ± 0.11 | 3.00 ± 0.27  | 160.00 ± 7.90   | 3.70 ± 0.54   |  |
|                           |     | ISO | 1R5F    | 0.12 ± 0.04 | 5.10 ± 0.64  | 160.00 ± 15.00  | 11.00 ± 0.74  |  |
|                           |     | ISO | 3R4F    | 0.76 ± 0.01 | 16.00 ± 0.38 | 590.00 ± 29.00  | 45.00 ± 1.50  |  |
|                           |     | ISO | CM6     | 1.20 ± 0.13 | 29.00 ± 2.40 | 680.00 ± 14.00  | 55.00 ± 0.69  |  |
| Cancelada et al. 2019     | Ind | HCI | IQOS-R  | 0.99 ± 0.10 | 2.52 ± 0.08  | 181.00 ± 31.00  | 5.40 ± 0.70   |  |
|                           |     | HCI | IQOS-M  | 0.60 ± 0.14 | 2.33 ± 0.07  | 151.00 ± 26.00  | 4.90 ± 0.60   |  |
|                           |     | HCI | IQOS-L  | 0.70 ± 0.06 | 2.31 ± 0.07  | 151.00 ± 26.00  | 5.30 ± 0.70   |  |
| Li et al. 2019            | Ind | HCI | IQOS-R  | 1.35 ± 0.07 | 8.84 ± 0.43  | 128.50 ± 9.96   | 4.01 ± 0.15   |  |
|                           |     | HCI | 3R4F    | 1.90        | 20.00        | 567.00          | 56.70         |  |
|                           |     | ISO | IQOS-R  | 0.50 ± 0.03 | 21.87 ± 0.81 | 210.00 ± 21.71  | 6.37 ± 0.32   |  |
|                           |     | ISO | 3R4F    | 0.71        | 68.10        | 1534.00         | 155.00        |  |
| Meehan-Atrash et al. 2019 | Ind | HCI | IQOS-L  | 1.23 ± 0.24 |              |                 |               |  |
|                           |     | HCI | Marlb   | 1.21 ± 0.15 |              |                 |               |  |
|                           |     | 55  | 30      | 3           | IQOS-R       | 1.22 ± 0.12     |               |  |
|                           |     | 55  | 30      | 3           | Marlb        | 1.11 ± 0.08     |               |  |
| Salman et al. 2019        | Ind | HCI | IQOS-R  | 1.50 ± 0.20 | 0.85 ± 0.28  | 301.46 ± 15.80  |               |  |
|                           |     | HCI | Marlb   | 1.80 ± 0.11 | 3.17 ± 0.33  | 1059.00 ± 9.03  |               |  |

|                         |     |     |     |    |           |              |              |                  |              |
|-------------------------|-----|-----|-----|----|-----------|--------------|--------------|------------------|--------------|
|                         |     |     | ISO |    | IQOS-R    | 0.77 ± 0.06  |              |                  |              |
|                         |     |     | ISO |    | Marlb     | 0.80 ± 0.05  |              |                  |              |
| Bitzer et al. 2020      | Ind | 2.5 | 30  | 75 | IQOS-R    | 1.47 ± 0.012 |              |                  |              |
|                         |     | 2.5 | 30  | 75 | 1R6F      | 2.08 ± 0.09  |              |                  |              |
| Wang et al. 2020        | Ind |     | ISO |    | IQOS-R    | 0.55 ± 0.01  | 8.80 ± 0.30  | 130.20 ± 4.60    | 4.30 ± 0.20  |
|                         |     |     | ISO |    | Ultra-Lit | 0.12 ± 0.01  | 4.20 ± 0.10  | 100.60 ± 4.50    | 8.50 ± 0.30  |
|                         |     |     | ISO |    | 3R4F      | 0.71 ± 0.01  | 20.00 ± 0.70 | 567.00 ± 10.00   | 56.70 ± 1.40 |
| Dusautoir et al. 2021   | Ind |     | HCI |    | IQOS-R    | 0.76         | 1.88 ± 0.11  | 320.25 ± 6.57    |              |
|                         |     |     | HCI |    | 3R4F      | 0.95         | 2.55 ± 0.61  | 1663.45 ± 595.40 |              |
| Perezhogina et al. 2021 | Ind |     | HCI |    | IQOS-R    | 1.1 ± 0.03   |              |                  |              |
|                         |     |     | HCI |    | IQOS-M    | 0.99 ± 0.08  |              |                  |              |
|                         |     |     | HCI |    | 3R4F      | 1.66 ± 0.11  |              |                  |              |

PMI: Philip Morris International; Ind: independent research; HCI: Health Canada Intense puffing regime; ISO: International Organization for Standardization puffing regime; IQOS-R: regular tobacco flavor sticks; IQOS-M: menthol flavored sticks; IQOS-Mn: mint flavored sticks; IQOS-L: light or yellow sticks; LSBL: Lucky Strike blue light cigarette; Marl: Marlboro regular cigarettes; Max-cig and Min-cig: the maximum and minimum yields of tobacco cigarettes as reported by Counts et al. (2005); Ultra-Lit: Ultra-light cigarette.
