# Supplementary material for: Analysis of mainstream emissions, secondhand emissions and the environmental impact of IQOS waste: a systematic review on IQOS that accounts for data source
Source: HighWire-hosted journal article supplement (doi:10.1136/tobaccocontrol-2021-056986), 2022-05-13
Supplement: tobaccocontrol-2021-056986supp002_data_supplement.pdf [file tobaccocontrol-2021-056986supp002_data_supplement.pdf]

To: Editor in Chief

**Re: A Systematic Review on IQOS that Accounts for Data Source: Analysis of Mainstream Emissions, Secondhand Emissions, and the Environmental Impact of IQOS waste**

Dear Dr. Barnoya,

Kindly find below the “answers to comments” related to the revision of the manuscript entitled: “**A Systematic Review on IQOS that Accounts for Data Source: Analysis of Mainstream Emissions, Secondhand Emissions, and the Environmental Impact of IQOS waste**” (tobaccocontrol-2021-056986.R4) submitted on Mar 30, 2022.

Formatting Amendments (where applicable):

Reviewer(s)' Comments to Author (if any):

Editor(s)' Comments to Author (if any):

In the abstract and methods section, they need to revise the search date with the search years as they do not match. Search date was Nov 2021, but the years range from 2020 to 2022.

**We thank the editor for this comment. The years range was changed in the Abstract and the Methods section to 2010-2021.**
